1 **Astrovirus Disrupts Intestinal Barrier Function by Activating Epithelial-**  
2 **Mesenchymal Transition**

3

4 Astrovirus Infection Induces EMT

5

6 Virginia Hargest,<sup>1</sup> Geoffrey Neale,<sup>2</sup> and Stacey Schultz-Cherry<sup>1,\*</sup>

7

8 <sup>1</sup> Department of Infectious Diseases, St. Jude Children's Research Hospital, Memphis, TN  
9 38105, USA

10

11 <sup>2</sup> Hartwell Center for Bioinformatics and Biotechnology, St. Jude Children's Research Hospital,  
12 Memphis, TN 38105, USA

13

14 \* Corresponding author: [stacey.schultz-cherry@stjude.org](mailto:stacey.schultz-cherry@stjude.org)

15

16 **Author contributions:** Conceptualization, V.H. and S.S.C.; data curation, V.H. and G.N.;  
17 formal analysis, V.H. and G.N.; funding acquisition, S.S.C.; investigation, V.H.; methodology,  
18 V.H.; project administration, S.S.C.; supervision, S.S.C.; visualization, V.H.; writing—original  
19 draft preparation, V.H. and S.S.C; writing—review and editing, all authors.

20

21

22

23

24

25

26

27

28

29

30

## 31 **Abstract**

32 Human astroviruses (HAstV), positive sense single-stranded RNA viruses, are one of the  
33 leading causes of diarrhea worldwide. Despite their high prevalence, the cellular mechanisms of  
34 astrovirus pathogenesis remain ill-defined. Previous studies showed HAstV increased epithelial  
35 barrier permeability by causing a relocalization of the tight junction protein, occludin. In these  
36 studies, we demonstrate that HAstV infection induces epithelial-mesenchymal transition (EMT),  
37 by upregulation the transcription of EMT-related genes within 8 hours post-infection (hpi),  
38 followed by the loss of cell-cell contacts and disruption of polarity by 24 hpi. Unlike the  
39 relocalization of tight junction proteins, HAstV-induced EMT requires productive replication and  
40 is independent of cellular factors including transforming growth factor- $\beta$  (TGF- $\beta$ ). While multiple  
41 classical HAstV serotypes, including clinical isolates, induce EMT, the non-classical genotype  
42 HAstV-VA1 and two strains of reovirus are incapable of inducing EMT. This finding puts  
43 classical strains of HAstV-1 in an exclusive group of non-oncogenic viruses triggering EMT.

44

## 45 **Author Summary**

46 While human astroviruses (HAstV) were discovered nearly 45 years ago, these small  
47 positive-sense RNA viruses remain critically understudied, leaving us with limited knowledge of  
48 its pathogenesis. This study fills the gap in knowledge demonstrating that HAstV are among a  
49 select group of viruses that induce epithelial-mesenchymal transition (EMT). Here we  
50 demonstrate that HAstV-1 replication induces transcriptional and phenotypic changes in  
51 intestinal epithelial cells associated with EMT. Additionally, we show inducing EMT is not  
52 common to enteric RNA viruses, as reovirus strains were found to be incapable of inducing  
53 EMT. Unlike the viruses that are known to induce EMT, astrovirus infection is not associated  
54 with cancer. We hypothesize that our findings will extend beyond astrovirus and may shed light  
55 on novel ways viruses can circumvent the barriers meant to protect against them.

## 56 **Introduction**

57           Epithelial and mesenchymal cells share inherent plasticity that allows for switching  
58 between the two cell states through a biological process known as epithelial-mesenchymal  
59 transition (EMT). EMT is essential in the development, differentiation, and repair of tissues and  
60 organs; however, EMT can negatively contribute to organ fibrosis and the initiation of cancerous  
61 metastases. EMT has been shown to induce stem cell properties [1,2], prevent apoptosis and  
62 senescence [3–5], and contribute to immunosuppression [6]. The complex process of EMT  
63 involves extensive reprogramming of gene expression, which can be regulated by numerous  
64 signaling pathways [7]. Activation of these signaling pathways ultimately results in the  
65 upregulation of the transcription factors including Snail1/2, Twist, and ZEB1/2 [7]. These  
66 transcription factors negatively regulate epithelial markers such as occludin, claudins, and E-  
67 cadherin, while positively regulating mesenchymal genes like N-cadherin, fibronectin, and  
68 vimentin [8]. This allows for the hallmark phenotypic changes associated with EMT like the  
69 disassembly of the epithelial cell-cell junctions, the loss of apical-basal polarity, and the  
70 formation of lamellipodia or filopodia to enable migration [9].

71           Epithelial cells that line the intestinal lumen function as a barrier that absorbs nutrients  
72 and electrolytes while restricting entry of harmful substances or pathogens [10]. Breaches in this  
73 barrier by death of the epithelial cells or disruption of cellular junctions through non-cytopathic  
74 mechanisms are associated with gastrointestinal diseases including irritable bowel syndrome,  
75 Crohn's disease, and colitis [11]. Along with these diseases, enteric viruses are known to  
76 compromise the gastrointestinal barrier. Human astroviruses (HAstV), small, non-enveloped  
77 positive-sense single-stranded RNA viruses, have been shown to predominantly infect  
78 differentiated epithelial cells at the tips of the intestinal villi [12,13]. We have demonstrated that  
79 astrovirus disrupts the intestinal barrier through a novel mechanism independent of cellular  
80 damage or induction of the host inflammatory response [14–16]. Instead, astroviruses increase  
81 barrier permeability by inducing the relocalization of the tight junction protein occludin [15]. The

82   relocalization of occludin by astrovirus does not require productive infection; the viral capsid  
83   protein alone is sufficient to cause disruption *in vivo* and *in vitro* [15,16]. Because loss of cell  
84   junctions is a phenotypic hallmark of EMT, we hypothesized that HAstV may serve as a viral  
85   trigger of EMT.

86           Indeed, several viruses are known to induce EMT including hepatitis B virus (HBV) [17],  
87   hepatitis C virus (HCV) [18], human papilloma virus (HPV) [19], Epstein-Barr virus (EBV) [20],  
88   and cytomegalovirus (CMV) [21,22]. These viruses, unlike HAstV, are oncogenic, and EMT  
89   induction leads to metastases, hepatocellular carcinoma, cervical carcinomas, and lymphoma  
90   among other diseases. Here, we demonstrate that HAstV is a non-oncogenic virus that also  
91   drives EMT. HAstV-induced EMT begins with an upregulation of EMT related genes and  
92   transcription factors at 8 hours post-infection (hpi). This is followed by a loss of epithelial cell-  
93   specific genes and proteins and gain of mesenchymal proteins like vimentin by 24 hpi. It is also  
94   accompanied by a loss of cellular polarity. Intriguingly, we demonstrate that HAstV activates  
95   TGF- $\beta$ , a well-established inducer of EMT. However, HAstV-induced EMT is independent of  
96   TGF- $\beta$  signaling but is dependent on productive viral replication. While multiple classical HAstV  
97   serotypes are capable of inducing EMT, other enteric viruses and even non-classical HAstV  
98   genotypes do not trigger EMT. The studies described here are amongst the first to demonstrate  
99   that a non-oncogenic virus drives EMT.

100

## 101   **Results**

### 102   **HAstV infection leads to EMT-associated gene modulation**

103           We have previously demonstrated that HAstV-1 leads to reorganization of occludin and  
104   the actin cytoskeleton without causing cell death [15]. This observation led us to hypothesize  
105   that HAstV infection induces EMT. Since EMT is a transcriptionally regulated process, we  
106   sought to determine if EMT-associated genes were modulated during HAstV-1 infection by first

107 performing microarray analysis. Gene set enrichment analysis (GSEA) of the microarray data  
108 demonstrated that several pathways were significantly upregulated in HAstV-infected versus  
109 uninfected Caco-2 cells at 24 hpi, including the EMT pathway (Figure S1). To investigate this  
110 further, we performed more targeted quantitative analysis by examining mRNA levels of EMT  
111 associated genes throughout infection by multiplexed qRT-PCR using Qiagen's RT<sup>2</sup> Profiler  
112 system (Figure S2). Cellular pathways associated with the induction of EMT were upregulated  
113 at 8 hpi including, Wnt, TGF- $\beta$ , and Notch, as were specific transcription factors known to drive  
114 EMT including Snail, ZEB1/2, and Twist. We validated the RT<sup>2</sup> Profiler findings by quantitating  
115 mRNA levels of EMT-related transcription factors as well as E-cadherin (*CDH1*), occludin  
116 (*OCLN*), Snail (*SNAI1*), and vimentin (*VIM*) by qRT-PCR. We observed an upregulation of the  
117 EMT-related transcription factors *SNAI1*, *TWIST1*, *ZEB1*, and *ZEB2* around 4hpi (Figure 1A).  
118 The activation of these transcription factors was followed by the downregulation of epithelial  
119 genes, *CDH1* and *OCLN*, as early as 8 hpi and the upregulation of mesenchymal gene *VIM* by  
120 24 hpi (Figure 1B). The upregulation of *SNAI1* was not sustained throughout infection but  
121 instead may be regulated in a biphasic manner as another increase in mRNA level was  
122 observed at 24hpi (Figure 1B).

### 123 **HAstV infection leads to a time-dependent reorganization and decrease in junctional** 124 **protein levels.**

125         Given the transcriptional changes, we asked if junctional protein expression was also  
126 disrupted during HAstV infection. To examine this, Caco-2 grown on glass coverslips were  
127 infected with HAstV-1 and stained for tight junction proteins, occludin and zonula occludens-1  
128 (ZO-1), and adherens junction proteins, E-cadherin and  $\beta$ -catenin, at 6, 12, 18, and 24 hpi.  
129 Mock-infected cells showed normal cell junction morphology, with a cobblestone-like staining  
130 pattern as protein localization was restricted to the cell periphery. However, HAstV-infected cells  
131 had disrupted junctional proteins. The disruption was as early as 6hpi with occludin beginning to  
132 re-localize away from the cell periphery (Figure 2A). Re-localization of occludin was followed by

133 ZO-1 moving from the cell membrane around 18 hpi. The most striking finding was the  
134 reorganization of E-cadherin, a key marker of epithelial cells [23], by 18 hpi. E-cadherin is  
135 crucial in the establishment and maintenance of the cellular junction complex as a whole  
136 [24,25], and aberrant expression of E-cadherin is a hallmark of epithelial dysregulation [7].  
137 Additionally, we observed an increase in vimentin staining correlating to the increase in vimentin  
138 mRNA. Not only did we observe cellular junction reorganization, but the overall proteins levels  
139 were also decreased. Over the course of 24 hours, expression of the junctional proteins  
140 occludin ( $p < 0.0001$ ), E-cadherin ( $p < 0.0001$ ), ZO-1 ( $p = 0.0058$ ), and  $\beta$ -catenin ( $p = 0.0139$ ) were  
141 all significantly decreased relative to mock-infected cells (Figure 2B, C), indicating the observed  
142 transcriptional changes during HAstV infection translated to a decrease in junctional protein  
143 expression.

#### 144 **HAstV-induced EMT disrupts cellular polarity**

145 Cellular junctions act as a physical barrier that prevent the movement of lipids and  
146 membrane proteins from migrating between the apical and basolateral cell membranes  
147 [26]. When cellular junctions are disassembled, proteins that were once localized to the  
148 basolateral membrane freely migrate to the apical side causing a loss of cellular polarity [27]. To  
149 determine if cellular polarity was disrupted during HAstV-1 infection, we stained for ezrin, a  
150 cytoplasmic linker between the apical membrane and the actin cytoskeleton [28], and sodium-  
151 potassium ATPase (Na/K-ATPase), a transporter localized to the basolateral membrane [29]. In  
152 mock-infected cells ezrin was distinctly localized to the apical side and Na/K-ATPase to the  
153 basolateral with very little overlap (Figure 3A). However, by 24 hpi there was less organized  
154 arrangement for both proteins. To quantitate the disruption of polarity, we measured the amount  
155 of Na/K-ATPase at apical membrane. At 24 hpi, there was significantly more Na/K-ATPase  
156 located at the apical membrane than in mock-infected cells (Figure 3B, C). We also noticed that  
157 cells appeared to lift or be extruded from the cell monolayer (Figure 3A; bottom panel). The  
158 transcriptional reprogramming, disassembly of epithelial cell-cell contacts, especially the

159 disruption and decreased production of E-cadherin, and disruption of cellular polarity all  
160 indicated that during HAstV-1 infection cells were undergoing EMT.

161 **TGF- $\beta$  activity is increased during HAstV infection but isn't involved in HAstV-induced**  
162 **EMT**

163 We next asked what viral and/or cellular factors were involved in HAstV-induced EMT .  
164 When examining the upregulation of mesenchymal genes, we observed that TGF- $\beta$  mRNA was  
165 increased at both 8 and 24 hpi (Figure S2). Since TGF- $\beta$  is the classical activator of EMT  
166 [7,30,31], we asked whether this increase in mRNA translated to an increase in TGF- $\beta$  activity.  
167 To measure active TGF- $\beta$  levels, we utilized a specific biological reporter assay where mink  
168 lung epithelial cells (Mv1Lu) stably express the PAI promoter upstream of luciferase [32].  
169 Supernatants collected from HAstV-1 infected Caco-2 cells between 4 and 24 hpi were added to  
170 the Mv1Lu-PAI cells and TGF- $\beta$  activity was quantitated. Supernatants from HAstV-1- infected  
171 cells contained significantly more active TGF- $\beta$  compared to mock-infected cells beginning at 6  
172 hpi and peaking at 12 hpi (Figure 4A). We also observed an increase in SMAD3 nuclear  
173 localization in HAstV-1-infected cells comparable to cells treated with TGF- $\beta$  alone and  
174 upregulation of *SERPINE1* mRNA, which is specifically activated by TGF- $\beta$ , mRNA at 24hpi  
175 (Figure 4B, C). These studies demonstrate that astrovirus infection leads to an increase in  
176 biologically active TGF- $\beta$ .

177 To determine if HAstV-induced EMT was dependent on this active TGF- $\beta$ , TGF- $\beta$   
178 signaling was inhibited using the small molecule inhibitor SB431542 [33], which selectively  
179 inhibits the phosphorylation of the TGF- $\beta$  type I receptor. Despite inhibiting TGF- $\beta$  signaling,  
180 SB431542 had no impact on HAstV-1-induced transcriptional regulation of genes associated  
181 with EMT (Figure 5A), and failed to restore E-cadherin protein expression (Figure 5B). This was  
182 not an unexpected result. Previous research showed that TGF- $\beta$ 1 does not easily induce EMT  
183 in Caco-2 cells [34]. Indeed, we found that the addition of 20 ng/ml TGF- $\beta$ 1 did not induce EMT

184 within the same time frame as HAstV. The loss of E-cadherin and disruption of polarity was not  
185 seen until 3 days following TGF- $\beta$  administration (Figure S3) suggesting that activation of TGF- $\beta$   
186 during infection is not the primary mechanism for HAstV-induced EMT. However, we cannot  
187 discount the possibility that TGF- $\beta$  plays a critical role in EMT induction *in vivo*, as we have  
188 shown TAsTV-2 infection in turkey poultts also causes an increase in TGF- $\beta$  activity [14].

### 189 **HAstV-induced EMT is dependent on viral replication**

190 Since the canonical cellular pathway for EMT induction was not involved in HAstV-  
191 induced EMT, we sought to determine if a viral factor was involved. When we performed the  
192 microarray analysis on infected and non-infected cells (Figure S1), we also performed an  
193 analysis on various differentiation states of uninfected Caco-2 cells given that less differentiated  
194 cells are less permissive to HAstV infection. Intriguingly, we found the EMT pathway was  
195 significantly downregulated in differentiated cells which are highly permissive to HAstV infection  
196 (Figure S4). This indicated that the EMT pathway is not associated with cellular differentiation  
197 and supported our hypothesis that it is induced by viral infection. To test this, we inoculated  
198 Caco-2 cells with UV-inactivated virus and assessed the hallmarks of EMT. UV-inactivated virus  
199 did not increase *SNAI1* mRNA, decrease *CDH1* leading to reduced E-cadherin expression, or  
200 disrupt cellular polarity (Figure 6A-C). Further, inhibition of ERK1/2, which is critical for HAstV  
201 replication [35], with U0126, rescued more than 27% of E-cadherin expression and cellular  
202 polarity (Figure 6D,E). These studies suggest that productive replication is required for the  
203 induction of EMT.

### 204 **The induction of EMT is unique to HAstV**

205 All of the previous studies were performed using a lab-adapted strain of HAstV-1, we  
206 next determined the breadth of HAstV strains capable of inducing EMT. Caco-2 cells were  
207 infected with three classical HAstVs isolated from patient samples, SJ054.225 (HAstV-1),  
208 SJ60.212 (HAstV-8), and SJ177.110 (HAstV-2), as well as lab adapted classical serotypes  
209 HAstV-8 and HAstV-2. All clinical isolates and lab-adapted serotypes disrupted the localization



210 (Figure 7A) and expression (Figure 7B) of E-cadherin. Additionally, infection with these viruses  
211 disrupted polarity as demonstrated by re-localization of both ezrin and Na/K ATPase (Figure  
212 7C). In contrast, the non-classical HAstV-VA1 genotype, which shares only 33% homology with  
213 HAstV-1 [36], failed to downregulate *CDH1* or upregulate *SNAI1* or *TWIST1* (Figure 8A) despite  
214 productively replicating in the Caco-2 cells (Figure 8B). The lack of EMT was not unique to  
215 HAstV-VA1. Reovirus stains T1L and T3SA+, while also productively replicated in Caco-2 cells,  
216 failed to disrupt E-cadherin protein localization (Figure 8B) or expression (Figure 8C). Finally,  
217 neither reovirus strain nor HAstV-VA1 were able to disrupt cellular polarity upon infection  
218 (Figure 8D). This shows classical HAstV is distinct among other enteric RNA viruses in the  
219 ability to induce EMT.

220

## 221 **Discussion**

222 In these studies, we demonstrate that HAstV replication triggers EMT in Caco-2 cells.  
223 Mechanistically, HAstV-induced EMT is driven by transcriptional changes; specifically, the  
224 downregulation of *CDH1* and *OCN* and the upregulation of the key transcriptional factor *SNAI1*  
225 early after infection. These transcriptional changes result in decreased epithelial protein levels,  
226 leading to a breakdown of the cell junctions, the loss of cellular polarity, and upregulation of  
227 mesenchymal cell-specific genes like *VIM* by 24 hpi. Despite an increase in active TGF- $\beta$  during  
228 HAstV infection, inhibition of TGF- $\beta$  signaling did not prevent the EMT phenotype. Instead the  
229 data we present showed that HAstV replication causes the transcriptional reprogramming  
230 associated with EMT.

231 While multiple classical HAstV serotypes induced EMT, this was not true of all astrovirus  
232 genotypes. HAstV-VA1 failed to drive EMT despite productively replicating in Caco-2 cells. We  
233 showed that HAstV-VA1 failed to upregulate the transcription factor *SNAI1* during a 24-hour  
234 infection. The lack of *SNAI1* regulation is a key finding as we observed multiple waves of *SNAI1*

235 upregulation with HAstV-1 infection (Figure 1), which is likely a driving force in HAstV-induced  
236 EMT. HAstV-VA1 is a non-classical HAstV strain, genetically more related to mink and ovine  
237 astroviruses than to the classical human serotypes [37–39]. Unlike classical HAstVs, HAstV-  
238 VA1 has rarely been linked to diarrhea [40,41] but has been reported in association with  
239 neurological disease [36,42]. Classical and non-classical HAstVs are genetically distinct and  
240 differ on key factors of replication and pathogenesis [43,44]. Since the novel HAstV strain was  
241 discovered just over 10 years ago, investigations into its pathogenesis are just beginning and  
242 our finding that it does not induce EMT may reveal an underlying fundamental difference  
243 between it and classical HAstVs.

244 The induction of EMT is also not a characteristic of other enteric RNA viruses. Reovirus,  
245 like HAstV, is a small RNA virus that can cause severe diarrhea in children [45]. Yet, two  
246 separate strains of reovirus were unable to cause the same phenotypic or transcriptional  
247 hallmarks of EMT. Attempts to examine coxsackievirus (CVB3)-induced EMT were unsuccessful  
248 due to the cytopathogenic nature of this virus. The lack of EMT induction by other enteric  
249 viruses also indicates this is not a phenomenon the Caco-2 cell line used as our *in vitro* model.  
250 Since Caco-2 cells are a carcinoma cell line, it could be suggested these cells are simply  
251 predisposed to undergo EMT. However, all viral infections were carried out under the same  
252 conditions in the Caco-2 cell line. Given the other viral stains did not induce EMT, our findings  
253 are not an artifact of the cells. EMT is a rare phenomenon triggered by only a few viruses and  
254 even less non-oncogenic viruses, making HAstV-induced EMT a truly unique finding.

255 Although our data suggests that TGF- $\beta$  is likely not the main mechanism utilized by  
256 HAstV to induce EMT, we believe it is still an important factor in astrovirus pathogenesis. TGF- $\beta$   
257 is upregulated in activity both *in vitro* and *in vivo* [14], so it must be an integral part of the viral  
258 pathogenesis. Interestingly, our SMAD3 staining showed that TGF- $\beta$  signaling is mostly  
259 occurring in non-infected cells in the epithelial monolayer. This bystander effect is likely very

260 important *in vivo* where TGF- $\beta$  can create an immune suppressive microenvironment [46] and  
261 could account for the lack of inflammation seen in *in vivo* astrovirus infections. Future studies will  
262 look at the role of TGF- $\beta$  activation in astrovirus replication.

263 Here we show that HAstV replication is triggering the transcriptional changes necessary  
264 for the induction of EMT. Using GSEA, we found Caco-2 cells that are highly permissive to  
265 HAstV infection significantly downregulated the EMT pathway (Figure S4). This is  
266 understandable as untreated cells do not undergo EMT and Caco-2 cells do not lose contact  
267 inhibition even after weeks in culture [47]. However, following HAstV-1 infection the EMT  
268 pathway was significantly upregulated, it indicated to us this pathway was induced by HAstV  
269 infection itself (Figure S1). Our previous research has shown the astrovirus capsid alone can  
270 increase barrier permeability and disrupt cellular junctions *in vitro* and *in vivo* [15,16].

271 Conversely, when HAstV-1 is UV-inactivated, preventing the virus from replicating its genome, it  
272 no longer is capable of inducing EMT. Additionally, when viral replication was suppressed using  
273 the ERK1/2 inhibitor U0126, we saw a decline in the hallmarks of EMT. The addition of U0126  
274 to HAstV infection did not completely reverse the effects of EMT, however this was expected as  
275 U0126 does not completely inhibit HAstV replication [35]. We hypothesize that there may be a  
276 binding event that is sufficient to cause some barrier permeability and the re-localization of  
277 occludin thus allowing the capsid protein alone to cause these events. However, a more  
278 intricate signaling cascade is triggered during replication of the virus that induces the EMT  
279 phenotype. While further research is needed to determine the exact aspect of replication that is  
280 initiating EMT, our current hypothesis is the production and activity of one of the HAstV non-  
281 structural proteins is involved.

282 Although the cleavage process of the HAstV nonstructural polyproteins is still not well  
283 characterized, it has been suggested at least four nonstructural proteins in addition to an RNA-  
284 dependent RNA polymerase (RdRp) are produced during replication [12]. However, the exact

285 function of these nonstructural proteins remains undetermined. It has been shown that genetic  
286 variation in at least one of the HAstV nonstructural proteins can impact viral RNA production  
287 and the amount of infectious virus shed [48,49]. Studies of the oncogenic viruses that induce  
288 EMT have shown strong evidence that viral proteins are heavily involved. The Xprotein of HBV  
289 [17,50–52], NS4B [53] and core protein of HCV [54–56], E5 [57] and E6/E7 oncoproteins of  
290 HPV [58,59], nuclear antigens [60] and latent membrane proteins of EBV [61–63], and  
291 immediate early proteins 1 and 2 of CMV [21] have all been shown to act as transcription factors  
292 inducing EMT. Given this, it is possible one of the nonstructural proteins or a cleavage product  
293 may impact the induction of EMT during HAstV infection. While we currently lack the tools  
294 necessary for additional studies focused on the nonstructural proteins, these studies will be  
295 critical in order to definitively identify if viral proteins are involved in HAstV-induced EMT.

296 In conclusion, we demonstrated HAstV replication induces EMT. To date, HAstV  
297 infection has not been associated as a risk factor for developing any type of cancer. This makes  
298 astrovirus unique as the majority of viruses known to induce EMT are oncogenic [64]. The data  
299 presented here not only provides increased knowledge on astrovirus pathogenesis but also  
300 induction of EMT from by a non-oncogenic virus. Studies are underway to examine what effect  
301 EMT has on astrovirus replication and if this process contributes to disease *in vivo*.

302

## 303 **Materials and Methods**

### 304 Cells and Virus Propagation

305 The human intestinal adenocarcinoma cell line Caco-2 was obtained from ATCC (HTB-37).  
306 Cells were propagated in minimum essential medium (MEM; Corning) supplemented with 20%  
307 fetal bovine serum (FBS; HyClone), GlutaMax-I (Gibco), and 1 mM sodium pyruvate (Gibco).  
308 HAstV-1, HAstV-2, and HAstV-8 lab adapted viral stocks were propagated in Caco-2 cells.  
309 Infectious titers were quantitated on Caco-2 cells by the fluorescent-focus assay as previously  
310 described [65].

311 To UV inactivate the virus, 100  $\mu$ l of HAstV-1 was subjected to 100 mJ/cm<sup>2</sup> with a UV cross-  
312 linker as described previously [15]. Inactivation was confirmed by the fluorescent-focus assay.  
313 Clinical isolates (SJ054.225, SJ60.212, and SJ177.110) were isolated as previously described  
314 [66].

315 The reovirus T1I and T3SA+ strains were generous gifts from Dr. Terence Dermody's lab at the  
316 University of Pittsburgh. HAstV-VA1 was a gift from Dr. David Wang's lab at Washington  
317 University in St. Louis.

### 318 Immunofluorescent Staining

319 Briefly, Caco-2 cells were seeded onto glass coverslips (for epithelial and vimentin staining) or  
320 transwells (polarity and SMAD3 staining). Once confluent, the cells were infected with HAstV-1  
321 (MOI 10) or mock infected. At various times post-infection, cells were fixed with 4%  
322 paraformaldehyde (for epithelial and vimentin staining) or 100% ice cold methanol (polarity and  
323 SMAD3 staining), and then blocked with 5% normal goat serum (NGS) in PBS at room  
324 temperature for 1 hour. The cells were stained for E-cadherin (33-4000; Invitrogen), occludin  
325 (71-1500; Invitrogen), ZO-1 (33-9100 and 61-7300; Invitrogen), sodium-potassium ATPase  
326 (ab167390; abcam), ezrin (MA5-13862; Invitrogen),  $\beta$ -catenin (ab32572; abcam), SMAD3 (51-  
327 1500; Invitrogen), HAstV capsid (8e7; DakoCytomation), and vimentin (ab92547; abcam) for 1  
328 hour followed by anti-mouse IgG-Alexa Fluor 488 or anti-rabbit IgG-Alexa Fluor 555 (Invitrogen)  
329 secondary antibodies and DAPI (4',6'-diamidino-2-phenylindole; Sigma) in 1% NGS for 30 min  
330 at room temperature. Following staining, coverslips or transwells were mounted onto slides with  
331 Prolong Gold Antifade Mountant (Invitrogen) and sealed. Cells were imaged with a Nikon  
332 TE2000 inverted microscope Images were captured with a Nikon 60x objective lens using Nikon  
333 NIS Elements software.

### 334 Western Blotting

335 Caco-2 cells were mock- or HAstV-1 (MOI 10) infected or were treated with an equal amount of  
336 UV-inactivated virus. At the indicated times, monolayers were lysed in 100  $\mu$ l of RIPA buffer

337 (Abcam) and 1× protease inhibitor cocktail (Pierce) for 15 min at room temperature and  
338 centrifuged at 14,000 × *g* for 5 min at 4°C. Protein concentrations were determined using the  
339 BCA Protein Assay Kit (Pierce). Equal protein concentrations of the soluble fraction were  
340 separated by sodium dodecyl sulfate-polyacrylamide gel electrophoresis (SDS-PAGE) (4-20%)  
341 under reducing conditions. Following transfer to nitrocellulose and probing for E-cadherin  
342 (33-4000; Invitrogen), occludin (71-1500; Invitrogen), ZO-1 (33-9100; Invitrogen), β-catenin  
343 (ab32572; abcam), vimentin (ab92547; abcam), and β-actin (A5441; Sigma). The blot was  
344 imaged on Licor Odyssey Fc and band densitometry was measured using Image Studio version  
345 5.2 software.

#### 346 Gene Expression Analysis by Microarray

347 Total RNA (100 ng) was converted to biotin-labeled cDNA using the Affymetrix WT Plus kit and  
348 hybridized to an Affymetrix Human Gene 2.0 ST GeneChip array (Life Technologies). Array  
349 probes were normalized and summarized to transcript-level signals by the RMA algorithm using  
350 the Affymetrix Expression Console software v1.1. Gene Set Enrichment Analysis (GSEA) was  
351 performed as described [67] using gene sets downloaded from MSigDB ([https://www.gsea-](https://www.gsea-msigdb.org/gsea/msigdb)  
352 [msigdb.org/gsea/msigdb](https://www.gsea-msigdb.org/gsea/msigdb)).

#### 353 RT<sup>2</sup> Profiler

354 Briefly, cells were seeded in 6-well plate, mock infected or HAstV-1 (MOI of 10) infected and  
355 collected at the indicated time point in TRIzol reagent (Thermo Fisher Scientific). Then, RNA  
356 was isolated according to the manufacturer's instructions. RNA quality was determined and was  
357 reverse transcribed using Qiagen's RT<sup>2</sup> First Strand Kit (Cat# 330401). The cDNA was used on  
358 the real-time RT<sup>2</sup> Profiler PCR Array (Cat# PAHS-090Z) in combination with RT<sup>2</sup> SYBR Green  
359 qPCR Mastermix (Cat# 330529). The CT values were then uploaded on to the data analysis  
360 web portal at <http://www.qiagen.com/geneglobe>. Samples were assigned to either control or test  
361 groups. The data was normalized based on a manual selection from full panel of reference

362 genes. The data analysis web portal calculated fold change/regulation using  $\Delta\Delta CT$  method, in  
363 which  $\Delta CT$  is calculated between gene of interest and an average of reference genes (B2M,  
364 HPRT1, and RPLP0), followed by  $\Delta\Delta CT$  calculations ( $\Delta CT$  (Test Group)- $\Delta CT$  (Control Group)).  
365 Fold Change was then calculated using  $2^{(-\Delta\Delta CT)}$  formula.

#### 366 RT-PCR

367 Caco-2 cells were infected with HAstV-1 or mock infected and RNA extracted at indicated  
368 timepoints using TRIzol (AMBION) according to manufacturer's specifications. Then qRT-PCR  
369 was performed using the QuantiTect SYBR green kit (Qiagen) primer assays for *OCLN* (cat#  
370 QT00081844), *CDH1* (cat# QT00080143), *SNAI1* (cat# QT00010010), *TWIST1* (cat#  
371 QT00011956), *ZEB1* (cat# QT00020972), *ZEB2* (cat# QT00008554), and *VIM1* (cat#  
372 QT00095795). The resulting Ct values were normalized to *GAPDH* (cat# QT00079247). The log  
373 transformed  $\Delta\Delta Ct$  values are reported as fold changes over untreated.

#### 374 Quantification of Sodium Potassium ATPase Staining

375 Following immunofluorescent staining and imaging, basal or apical localization of sodium-  
376 potassium ATPase was determined by measuring mean fluorescent intensity above and below  
377 cell midline using ImageJ 1.50i software. Results were expressed as a ratio of basal fluorescent  
378 intensity to apical fluorescent intensity.

#### 379 TGF- $\beta$ Activity Assay

380 TGF- $\beta$  activity was measured using a luciferase reporter cell line, as previously described [32].  
381 Briefly, mink lung epithelial cells (Mv1Lu), stably transfected with a luciferase reporter construct  
382 downstream of the plasminogen activator inhibitor-1 (PAI-1) promoter, were plated in a 96-well  
383 tissue culture plate ( $2 \times 10^4$ ). These cells were inoculated with supernatants (100  $\mu$ l) taken from  
384 HAstV-1 (MOI 10) or mock-infected Caco-2 cells at various times post-infection and incubated  
385 at 37°C for 16-20 hours. The inoculum was removed and the cells washed twice with PBS. Cell

386 lysates were prepared and assayed for luciferase activity using the Luciferase Assay System  
387 (Promega) and imaged on the Cytation 5 Cell Imaging Multi-Mode Reader (BioTek).

### 388 SB431542 and U0126 Treatment

389 Briefly,  $5 \times 10^4$  cells were seeded into transwells (3074; Corning), and once confluent,  
390 transferred into serum free media for at least 1 hour. The cells were treated with 10 $\mu$ M  
391 SB431542 (Tocris) or U0126 (Promega) 1 hour prior to infection. Then the cells were infected  
392 with HAstV-1 (MOI of 5), TGF- $\beta$  treated (20 ng/ml), or mock infected, according to experiment,  
393 in serum free media. Following the virus adsorption period of 1 hour, the inoculum was removed  
394 and fresh media containing 10 $\mu$ M SB431542 or U0126 was replaced. DMSO was used as the  
395 vehicle control in both experimental setups.

### 396 Statistical Analysis

397 Data were analyzed by ordinary one-way ANOVA (RT-PCR of epithelial and mesenchymal  
398 genes), ordinary one-way ANOVA followed by a test for trend (epithelial protein expression),  
399 two-tailed student t-test (Na/K-ATPase localization), two-way ANOVA followed by Sidak's  
400 multiple comparisons test (TGF- $\beta$  Activity), ordinary one-way ANOVA followed by Dunnett's  
401 multiple comparisons test (E-cad expression with SB431542, UV-inactivated virus, and U0126,  
402 and RT-PCR with SB431542 and UV-inactivated virus), using GraphPad Prism version 8.  
403 Asterisks show statistical significance as follows: \*,  $P < 0.05$ ; \*\*,  $P < 0.01$ ; \*\*\*,  $P < 0.001$ .

404

### 405 **Acknowledgments**

406 We would like to thank Jennifer Peters and the St. Jude Light Microscopy Core for their help  
407 and guidance with the confocal imaging for this study; Dr. Terence Dermody, Dr. Julie Pfeiffer,  
408 and Dr. David Wang for their generous gifts of the reovirus, coxsackievirus, and HAstV-VA1  
409 strains and antibodies, respectively; Rebekah Honce for input on the design of figures. Valerie



410 Cortez and Victoria Meliopoulos for the isolation and propagation of the HAstV clinical isolates  
411 as well as for edits of the manuscript.

412 This research was supported by NIH grant R21 AI135254-01. The content is solely the  
413 responsibility of the authors and does not necessarily represent the official views of the National  
414 Institutes of Health. St. Jude Children’s Research Hospital Children’s Infection Defense Center  
415 and ALSAC also provided funding for this work. Images were acquired at the Cell & Tissue  
416 Imaging Center which is supported by SJCRH and NCI P30 CA021765. Microarray data were  
417 generated in the Hartwell Center for Bioinformatics and Biotechnology which is also supported  
418 by P30 CA021765.

419

420 **Competing interests:** Authors declare no competing interests.

421

422 **Data Availability:** All relevant data are within the paper and its Supplementary Materials files.

423 Microarray data has been deposited in the GEO database with accession number GSE166820.

424

## 425 **References**

426 1. Mani SA, Guo W, Liao M-J, Eaton EN, Ayyanan A, Zhou AY, et al. The epithelial-mesenchymal  
427 transition generates cells with properties of stem cells. *Cell*. 2008;133: 704–715.  
428 doi:10.1016/j.cell.2008.03.027

429 2. Morel A-P, Lièvre M, Thomas C, Hinkal G, Ansieau S, Puisieux A. Generation of breast cancer stem  
430 cells through epithelial-mesenchymal transition. *PloS One*. 2008;3: e2888.  
431 doi:10.1371/journal.pone.0002888

432 3. Gal A, Sjöblom T, Fedorova L, Imreh S, Beug H, Moustakas A. Sustained TGF beta exposure  
433 suppresses Smad and non-Smad signalling in mammary epithelial cells, leading to EMT and  
434 inhibition of growth arrest and apoptosis. *Oncogene*. 2008;27: 1218–1230.  
435 doi:10.1038/sj.onc.1210741

436 4. Thiery JP, Acloque H, Huang RYJ, Nieto MA. Epithelial-Mesenchymal Transitions in Development  
437 and Disease. *Cell*. 2009;139: 871–890. doi:10.1016/j.cell.2009.11.007

438 5. Ansieau S, Bastid J, Doreau A, Morel A-P, Bouchet BP, Thomas C, et al. Induction of EMT by twist  
439 proteins as a collateral effect of tumor-promoting inactivation of premature senescence. *Cancer*  
440 *Cell*. 2008;14: 79–89. doi:10.1016/j.ccr.2008.06.005

- 441 6. Kudo-Saito C, Shirako H, Takeuchi T, Kawakami Y. Cancer metastasis is accelerated through  
442 immunosuppression during Snail-induced EMT of cancer cells. *Cancer Cell*. 2009;15: 195–206.  
443 doi:10.1016/j.ccr.2009.01.023
- 444 7. Gonzalez DM, Medici D. Signaling mechanisms of the epithelial-mesenchymal transition. *Sci Signal*.  
445 2014;7: re8. doi:10.1126/scisignal.2005189
- 446 8. Lamouille S, Xu J, Derynck R. Molecular mechanisms of epithelial-mesenchymal transition. *Nat Rev*  
447 *Mol Cell Biol*. 2014;15: 178–196. doi:10.1038/nrm3758
- 448 9. Thiery JP, Sleeman JP. Complex networks orchestrate epithelial–mesenchymal transitions. *Nat Rev*  
449 *Mol Cell Biol*. 2006;7: 131–142. doi:10.1038/nrm1835
- 450 10. Ulluwishewa D, Anderson RC, McNabb WC, Moughan PJ, Wells JM, Roy NC. Regulation of tight  
451 junction permeability by intestinal bacteria and dietary components. *J Nutr*. 2011;141: 769–776.  
452 doi:10.3945/jn.110.135657
- 453 11. Odenwald MA, Turner JR. Intestinal permeability defects: is it time to treat? *Clin Gastroenterol*  
454 *Hepatol Off Clin Pract J Am Gastroenterol Assoc*. 2013;11: 1075–1083.  
455 doi:10.1016/j.cgh.2013.07.001
- 456 12. Cortez V, Meliopoulos VA, Karlsson EA, Hargest V, Johnson C, Schultz-Cherry S. Astrovirus  
457 *Biology and Pathogenesis*. *Annu Rev Virol*. 2017. doi:10.1146/annurev-virology-101416-041742
- 458 13. Sebire NJ, Malone M, Shah N, Anderson G, Gaspar HB, Cubitt WD. Pathology of astrovirus  
459 associated diarrhoea in a paediatric bone marrow transplant recipient. *J Clin Pathol*. 2004;57:  
460 1001–1003. doi:10.1136/jcp.2004.017178
- 461 14. Koci MD, Moser LA, Kelley LA, Larsen D, Brown CC, Schultz-Cherry S. Astrovirus induces diarrhea  
462 in the absence of inflammation and cell death. *J Virol*. 2003;77: 11798–11808.
- 463 15. Moser LA, Carter M, Schultz-Cherry S. Astrovirus increases epithelial barrier permeability  
464 independently of viral replication. *J Virol*. 2007;81: 11937–11945. doi:10.1128/JVI.00942-07
- 465 16. Meliopoulos VA, Marvin SA, Freiden P, Moser LA, Nighot P, Ali R, et al. Oral Administration of  
466 Astrovirus Capsid Protein Is Sufficient To Induce Acute Diarrhea In Vivo. *mBio*. 2016;7.  
467 doi:10.1128/mBio.01494-16
- 468 17. Shin Kim S, Yeom S, Kwak J, Ahn H-J, Lib Jang K. Hepatitis B virus Xprotein induces epithelial-  
469 mesenchymal transition by repressing E-cadherin expression via upregulation of E12/E47. *J Gen*  
470 *Virol*. 2016;97: 134–143. doi:10.1099/jgv.0.000324
- 471 18. Bose SK, Meyer K, Di Bisceglie AM, Ray RB, Ray R. Hepatitis C virus induces epithelial-  
472 mesenchymal transition in primary human hepatocytes. *J Virol*. 2012;86: 13621–13628.  
473 doi:10.1128/JVI.02016-12
- 474 19. Chamulitrat W, Sattayakhom A, Herold-Mende C, Herold-Mended C, Stremmel W. Human  
475 papillomavirus 16 E6/E7-immortalized human gingival keratinocytes with epithelial mesenchymal  
476 transition acquire increased expression of cIAP-1, Bclx and p27(Kip1). *Exp Dermatol*. 2009;18:  
477 1067–1069. doi:10.1111/j.1600-0625.2009.00888.x
- 478 20. Horikawa T, Yang J, Kondo S, Yoshizaki T, Joab I, Furukawa M, et al. Twist and epithelial-  
479 mesenchymal transition are induced by the EBV oncoprotein latent membrane protein 1 and are  
480 associated with metastatic nasopharyngeal carcinoma. *Cancer Res*. 2007;67: 1970–1978.  
481 doi:10.1158/0008-5472.CAN-06-3933

- 482 21. Shimamura M, Murphy-Ullrich JE, Britt WJ. Human cytomegalovirus induces TGF- $\beta$ 1 activation in  
483 renal tubular epithelial cells after epithelial-to-mesenchymal transition. *PLoS Pathog.* 2010;6:  
484 e1001170. doi:10.1371/journal.ppat.1001170
- 485 22. Teo WH, Chen H-P, Huang JC, Chan Y-J. Human cytomegalovirus infection enhances cell  
486 proliferation, migration and upregulation of EMT markers in colorectal cancer-derived stem cell-like  
487 cells. *Int J Oncol.* 2017;51: 1415–1426. doi:10.3892/ijo.2017.4135
- 488 23. van Roy F, Berx G. The cell-cell adhesion molecule E-cadherin. *Cell Mol Life Sci.* 2008;65: 3756–  
489 3788. doi:10.1007/s00018-008-8281-1
- 490 24. Gumbiner B, Stevenson B, Grimaldi A. The role of the cell adhesion molecule uvomorulin in the  
491 formation and maintenance of the epithelial junctional complex. *J Cell Biol.* 1988;107: 1575–1587.  
492 doi:10.1083/jcb.107.4.1575
- 493 25. Lewis JE, Wahl JK, Sass KM, Jensen PJ, Johnson KR, Wheelock MJ. Cross-talk between adherens  
494 junctions and desmosomes depends on plakoglobin. *J Cell Biol.* 1997;136: 919–934.  
495 doi:10.1083/jcb.136.4.919
- 496 26. Moreno-Bueno G, Portillo F, Cano A. Transcriptional regulation of cell polarity in EMT and cancer.  
497 *Oncogene.* 2008;27: 6958–6969. doi:10.1038/onc.2008.346
- 498 27. Thiery JP. Epithelial–mesenchymal transitions in development and pathologies. *Curr Opin Cell Biol.*  
499 2003;15: 740–746. doi:10.1016/j.ceb.2003.10.006
- 500 28. Pelaseyed T, Bretscher A. Regulation of actin-based apical structures on epithelial cells. *J Cell Sci.*  
501 2018;131. doi:10.1242/jcs.221853
- 502 29. Bystriansky JS, Kaplan JH. Sodium pump localization in epithelia. *J Bioenerg Biomembr.* 2007;39:  
503 373–378. doi:10.1007/s10863-007-9100-3
- 504 30. Moustakas A, Heldin C-H. Signaling networks guiding epithelial–mesenchymal transitions during  
505 embryogenesis and cancer progression. *Cancer Sci.* 2007;98: 1512–1520. doi:10.1111/j.1349-  
506 7006.2007.00550.x
- 507 31. Tsubakihara Y, Moustakas A. Epithelial-Mesenchymal Transition and Metastasis under the Control  
508 of Transforming Growth Factor  $\beta$ . *Int J Mol Sci.* 2018;19. doi:10.3390/ijms19113672
- 509 32. Abe M, Harpel JG, Metz CN, Nunes I, Loskutoff DJ, Rifkin DB. An assay for transforming growth  
510 factor-beta using cells transfected with a plasminogen activator inhibitor-1 promoter-luciferase  
511 construct. *Anal Biochem.* 1994;216: 276–284. doi:10.1006/abio.1994.1042
- 512 33. Inman GJ, Nicolás FJ, Callahan JF, Harling JD, Gaster LM, Reith AD, et al. SB-431542 is a potent  
513 and specific inhibitor of transforming growth factor-beta superfamily type I activin receptor-like  
514 kinase (ALK) receptors ALK4, ALK5, and ALK7. *Mol Pharmacol.* 2002;62: 65–74.  
515 doi:10.1124/mol.62.1.65
- 516 34. Buckley ST, Medina C, Ehrhardt C. Differential susceptibility to epithelial-mesenchymal transition  
517 (EMT) of alveolar, bronchial and intestinal epithelial cells in vitro and the effect of angiotensin II  
518 receptor inhibition. *Cell Tissue Res.* 2010;342: 39–51. doi:10.1007/s00441-010-1029-x
- 519 35. Moser LA, Schultz-Cherry S. Suppression of astrovirus replication by an ERK1/2 inhibitor. *J Virol.*  
520 2008;82: 7475–7482. doi:10.1128/JVI.02193-07

- 521 36. Vu D-L, Bosch A, Pintó RM, Guix S. Epidemiology of Classic and Novel Human Astrovirus:  
522 Gastroenteritis and Beyond. *Viruses*. 2017;9. doi:10.3390/v9020033
- 523 37. Finkbeiner SR, Li Y, Ruone S, Conrardy C, Gregoricus N, Toney D, et al. Identification of a novel  
524 astrovirus (astrovirus VA1) associated with an outbreak of acute gastroenteritis. *J Virol*. 2009;83:  
525 10836–10839. doi:10.1128/JVI.00998-09
- 526 38. Finkbeiner SR, Holtz LR, Jiang Y, Rajendran P, Franz CJ, Zhao G, et al. Human stool contains a  
527 previously unrecognized diversity of novel astroviruses. *Virology*. 2009;6: 161. doi:10.1186/1743-  
528 422X-6-161
- 529 39. Finkbeiner SR, Kirkwood CD, Wang D. Complete genome sequence of a highly divergent astrovirus  
530 isolated from a child with acute diarrhea. *Virology*. 2008;5: 117. doi:10.1186/1743-422X-5-117
- 531 40. Holtz LR, Bauer IK, Rajendran P, Kang G, Wang D. Astrovirus MLB1 is not associated with diarrhea  
532 in a cohort of Indian children. *PLoS One*. 2011;6: e28647. doi:10.1371/journal.pone.0028647
- 533 41. Meyer CT, Bauer IK, Antonio M, Adeyemi M, Saha D, Oundo JO, et al. Prevalence of classic, MLB-  
534 clade and VA-clade Astroviruses in Kenya and The Gambia. *Virology*. 2015;12: 78.  
535 doi:10.1186/s12985-015-0299-z
- 536 42. Vu D-L, Cordey S, Brito F, Kaiser L. Novel human astroviruses: Novel human diseases? *J Clin Virol*.  
537 2016;82: 56–63. doi:10.1016/j.jcv.2016.07.004
- 538 43. Janowski AB, Bauer IK, Holtz LR, Wang D. Propagation of Astrovirus VA1, a Neurotropic Human  
539 Astrovirus, in Cell Culture. *J Virol*. 2017;91. doi:10.1128/JVI.00740-17
- 540 44. Hargest V, Davis AE, Tan S, Cortez V, Schultz-Cherry S. Human Astroviruses: A Tale of Two  
541 Strains. *Viruses*. 2021;13. doi:10.3390/v13030376
- 542 45. Dermody TS. Orthoreoviruses. 6th ed. *Fields Virology*. 6th ed. Lippincott Williams and Wilkins;  
543 2013. pp. 1304–1346.
- 544 46. McCartney-Francis NL, Frazier-Jessen M, Wahl SM. TGF- $\beta$ : A Balancing Act. *Int Rev Immunol*.  
545 1998;16: 553–580. doi:10.3109/08830189809043009
- 546 47. Vachon PH, Beaulieu J-F. Transient mosaic patterns of morphological and functional differentiation  
547 in the Caco-2 cell line. *Gastroenterology*. 1992;103: 414–423. doi:10.1016/0016-5085(92)90829-N
- 548 48. Guix S, Caballero S, Bosch A, Pintó RM. Human astrovirus C-terminal nsP1a protein is involved in  
549 RNA replication. *Virology*. 2005;333: 124–131. doi:10.1016/j.virol.2004.12.023
- 550 49. Guix S, Caballero S, Fuentes C, Bosch A, Pintó RM. Genetic analysis of the hypervariable region of  
551 the human astrovirus nsP1a coding region: design of a new RFLP typing method. *J Med Virol*.  
552 2008;80: 306–315. doi:10.1002/jmv.21058
- 553 50. Zha Y, Yao Q, Liu J-S, Wang Y-Y, Sun W-M. Hepatitis B virus X protein promotes epithelial-  
554 mesenchymal transition and metastasis in hepatocellular carcinoma cell line HCCLM3 by targeting  
555 HMGA2. *Oncol Lett*. 2018;16: 5709–5714. doi:10.3892/ol.2018.9359
- 556 51. Jin Y, Wu D, Yang W, Weng M, Li Y, Wang X, et al. Hepatitis B virus x protein induces epithelial-  
557 mesenchymal transition of hepatocellular carcinoma cells by regulating long non-coding RNA. *Virology*.  
558 2017;14: 238. doi:10.1186/s12985-017-0903-5

- 559 52. Li M, Hu L, Zhu F, Zhou Z, Tian J, Ai J. Hepatitis B virus X protein promotes renal epithelial-  
560 mesenchymal transition in human renal proximal tubule epithelial cells through the activation of NF-  
561  $\kappa$ B. *Int J Mol Med*. 2016;38: 513–520. doi:10.3892/ijmm.2016.2637
- 562 53. Hu B, Xie S, Hu Y, Chen W, Chen X, Zheng Y, et al. Hepatitis C virus NS4B protein induces  
563 epithelial-mesenchymal transition by upregulation of Snail. *Virology*. 2017;14: 83.  
564 doi:10.1186/s12985-017-0737-1
- 565 54. Tiwari I, Yoon M-H, Park B-J, Jang KL. Hepatitis C virus core protein induces epithelial-  
566 mesenchymal transition in human hepatocytes by upregulating E12/E47 levels. *Cancer Lett*.  
567 2015;362: 131–138. doi:10.1016/j.canlet.2015.03.032
- 568 55. Zhou J-J, Meng Z, He X-Y, Cheng D, Ye H-L, Deng X-G, et al. Hepatitis C virus core protein  
569 increases Snail expression and induces epithelial-mesenchymal transition through the signal  
570 transducer and activator of transcription 3 pathway in hepatoma cells. *Hepatol Res Off J Jpn Soc*  
571 *Hepatol*. 2017;47: 574–583. doi:10.1111/hepr.12771
- 572 56. Liu D, Wu J, Liu M, Yin H, He J, Zhang B. Downregulation of miRNA-30c and miR-203a is  
573 associated with hepatitis C virus core protein-induced epithelial-mesenchymal transition in normal  
574 hepatocytes and hepatocellular carcinoma cells. *Biochem Biophys Res Commun*. 2015;464: 1215–  
575 1221. doi:10.1016/j.bbrc.2015.07.107
- 576 57. Ranieri D, Belleudi F, Magenta A, Torrioni MR. HPV16 E5 expression induces switching from  
577 FGFR2b to FGFR2c and epithelial-mesenchymal transition. *Int J Cancer*. 2015;137: 61–72.  
578 doi:10.1002/ijc.29373
- 579 58. Zhang W, Wu X, Hu L, Ma Y, Xiu Z, Huang B, et al. Overexpression of Human Papillomavirus Type  
580 16 Oncoproteins Enhances Epithelial-Mesenchymal Transition via STAT3 Signaling Pathway in  
581 Non-Small Cell Lung Cancer Cells. *Oncol Res*. 2017;25: 843–852.  
582 doi:10.3727/096504016X14813880882288
- 583 59. Jung Y-S, Kato I, Kim H-RC. A novel function of HPV16-E6/E7 in epithelial-mesenchymal transition.  
584 *Biochem Biophys Res Commun*. 2013;435: 339–344. doi:10.1016/j.bbrc.2013.04.060
- 585 60. Gaur N, Gandhi J, Robertson ES, Verma SC, Kaul R. Epstein-Barr virus latent antigens EBNA3C  
586 and EBNA1 modulate epithelial to mesenchymal transition of cancer cells associated with tumor  
587 metastasis. *Tumour Biol J Int Soc Oncodevelopmental Biol Med*. 2015;36: 3051–3060.  
588 doi:10.1007/s13277-014-2941-6
- 589 61. Morris MA, Laverick L, Wei W, Davis AM, O'Neill S, Wood L, et al. The EBV-Encoded Oncoprotein,  
590 LMP1, Induces an Epithelial-to-Mesenchymal Transition (EMT) via Its CTAR1 Domain through  
591 Integrin-Mediated ERK-MAPK Signalling. *Cancers*. 2018;10. doi:10.3390/cancers10050130
- 592 62. Kim S-M, Oh SW, Park SH, Hur DY, Hong S-W, Han SY. Epstein-Barr virus-encoded latent  
593 membrane protein 1 induces epithelial to mesenchymal transition by inducing V-set Ig domain  
594 containing 4 (VSIG4) expression via NF- $\kappa$ B in renal tubular epithelial HK-2 cells. *Biochem Biophys*  
595 *Res Commun*. 2017;492: 316–322. doi:10.1016/j.bbrc.2017.08.116
- 596 63. Wasil LR, Shair KHY. Epstein-Barr virus LMP1 induces focal adhesions and epithelial cell migration  
597 through effects on integrin- $\alpha$ 5 and N-cadherin. *Oncogenesis*. 2015;4: e171.  
598 doi:10.1038/oncsis.2015.31
- 599 64. Chen X, Bode AM, Dong Z, Cao Y. The epithelial-mesenchymal transition (EMT) is regulated by  
600 oncoviruses in cancer. *FASEB J Off Publ Fed Am Soc Exp Biol*. 2016;30: 3001–3010.  
601 doi:10.1096/fj.201600388R

- 602 65. Marvin S, Meliopoulos V, Schultz-Cherry S. Human Astrovirus Propagation, Purification and  
603 Quantification. *BIO-Protoc.* 2014;4. doi:10.21769/BioProtoc.1078
- 604 66. Hargest V, Sharp B, Livingston B, Cortez V, Schultz-Cherry S. Astrovirus Replication Is Inhibited by  
605 Nitazoxanide *In Vitro* and *In Vivo*. Pfeiffer JK, editor. *J Virol.* 2020;94:  
606 e01706-19. doi:10.1128/JVI.01706-19
- 607 67. Subramanian A, Tamayo P, Mootha VK, Mukherjee S, Ebert BL, Gillette MA, et al. Gene set  
608 enrichment analysis: A knowledge-based approach for interpreting genome-wide expression  
609 profiles. *Proc Natl Acad Sci.* 2005;102: 15545–15550. doi:10.1073/pnas.0506580102

610

## 611 Figures

612

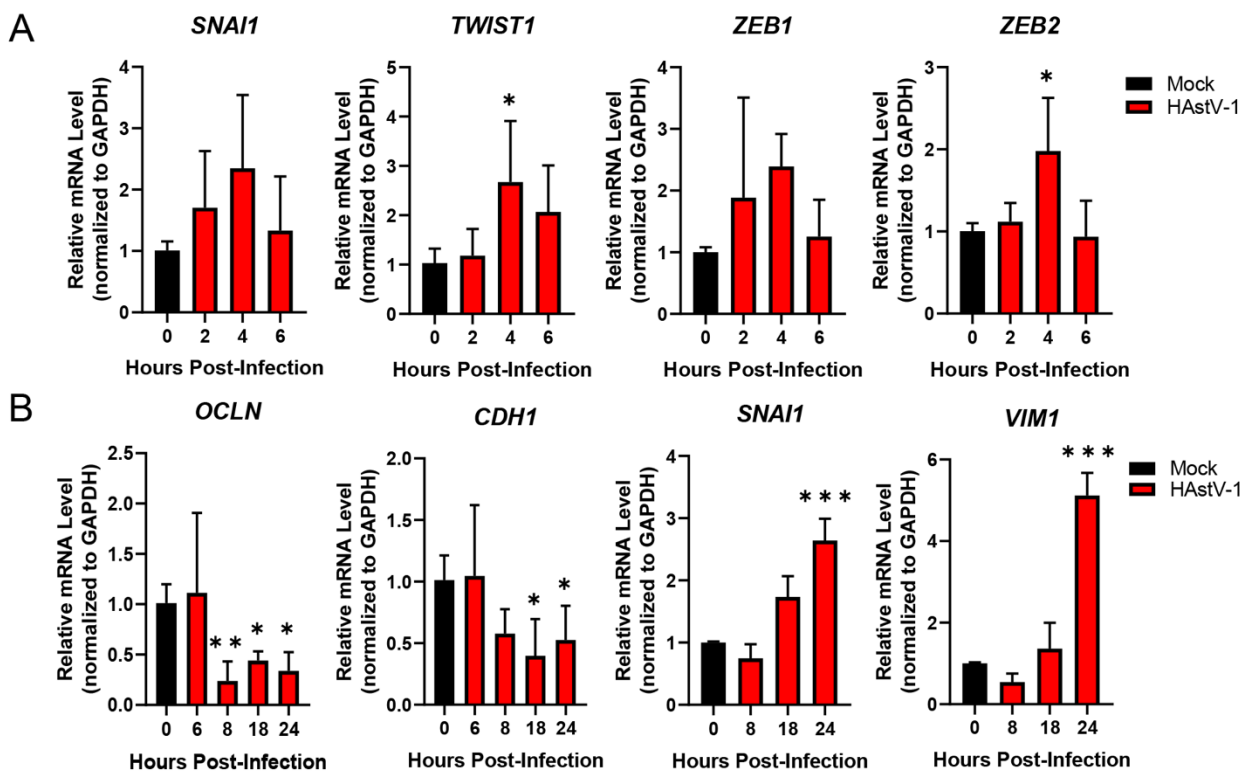

613

614 **Fig. 1. HAdV-1 infection leads to a decrease in epithelial markers while increasing**  
615 **mesenchymal markers.** (A) Early in infection EMT transcription factors (*SNAI1*,  
616 *TWIST1*, *ZEB1* and *ZEB2*) are upregulated causing epithelial genes (*OCLN* and  
617 *CDH1*) to be down regulated and mesenchymal genes (*SNAI1* and *VIM*) to be  
618 upregulated during the course of HAdV-1 infection. Error bars indicate standard  
619 deviations from two independent experiments performed in triplicate, and  
620 asterisks show statistical significance as measured by Two-way ANOVA followed  
621 by Tukey's multiple comparisons test as follows: \*,  $P < 0.05$ ; \*\*,  $P < 0.01$ ; \*\*\*,  $P <$   
622  $0.001$ .

623

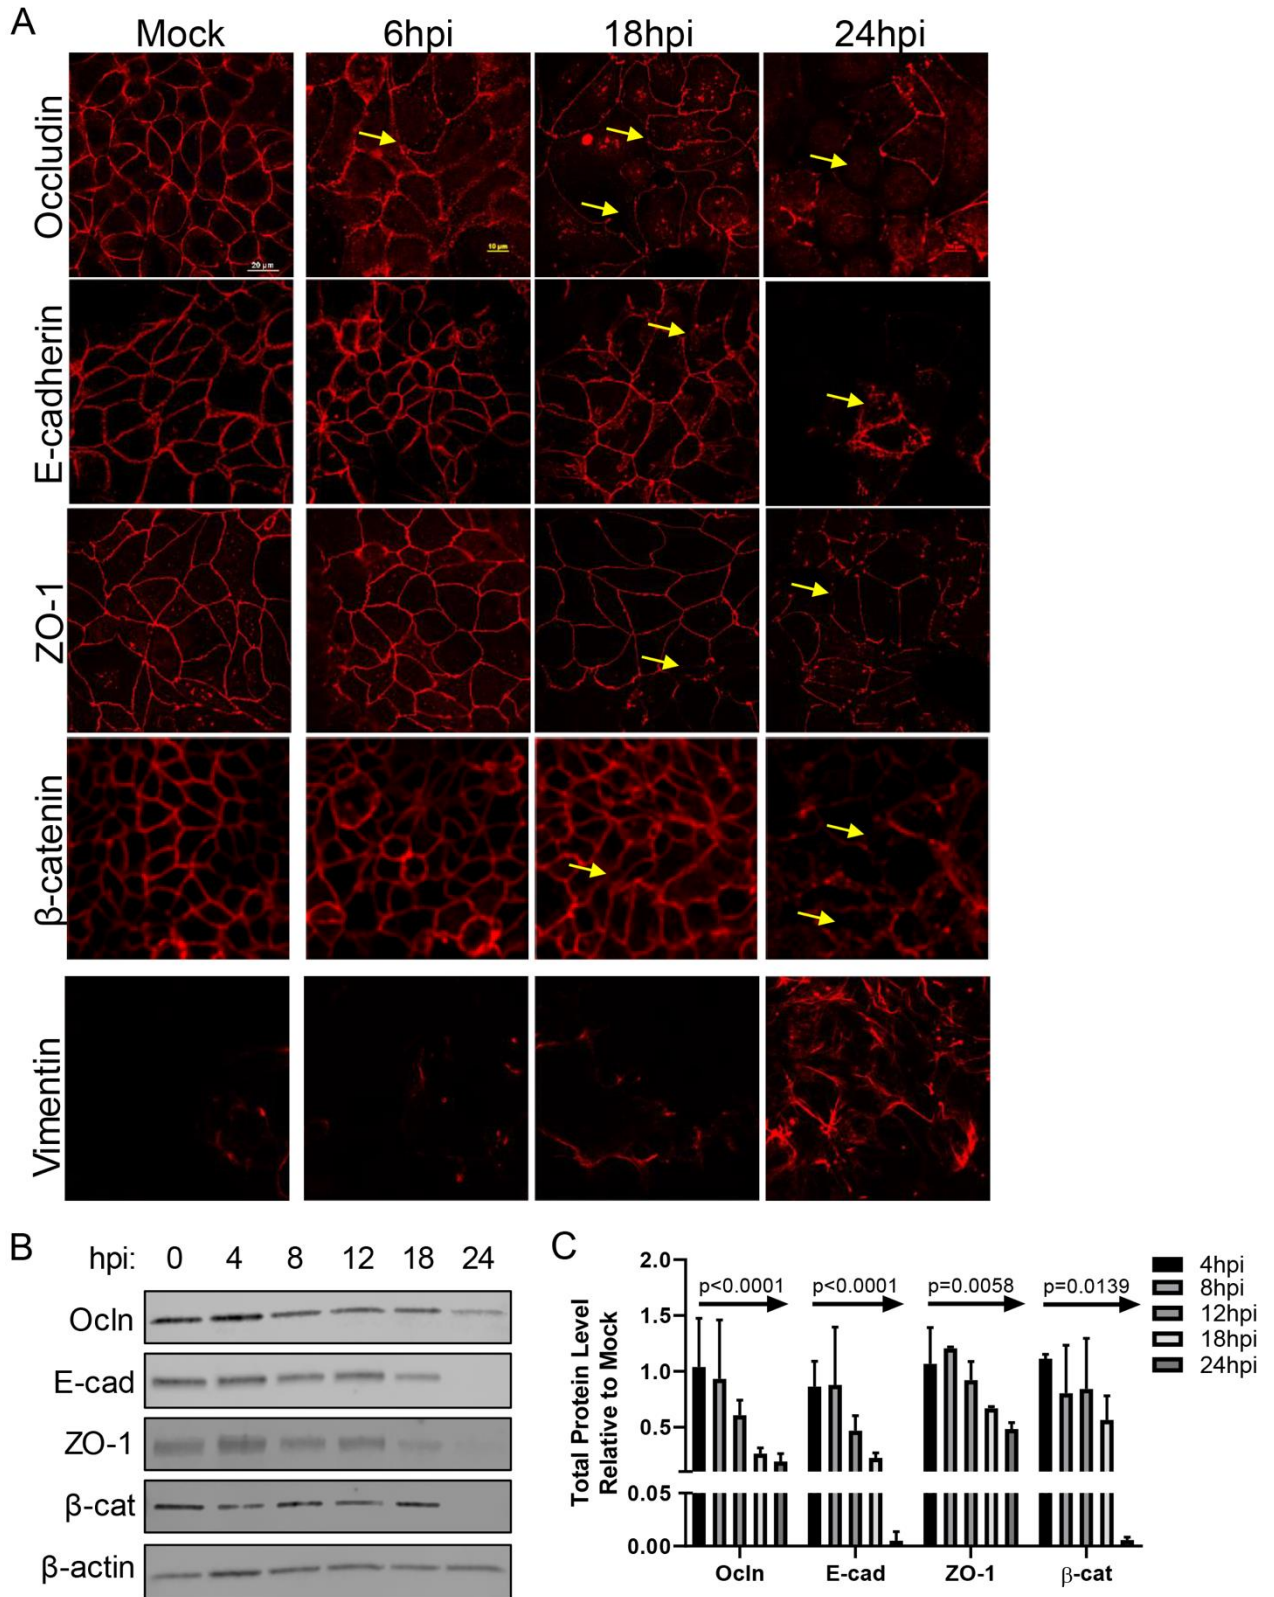

**Fig. 2. HAstV-1 infection leads to a time-dependent decrease in junctional protein levels.** (A) Caco-2 monolayers on grown coverslips, infected with HAstV-1 (MOI

624  
625  
626  
627

628  
629  
630  
631  
632  
633  
634  
635  
636  
637  
638  
639

of 10) or mock infected. Cells were fixed at 6, 18, and 24 hpi in 4% paraformaldehyde and then stained for the indicated junctional proteins. Arrows indicate areas of junctional disruption. Images are representative of at least three independent experiments. (B) Expression of epithelial markers, occludin (Ocln), E-cadherin (E-cad), ZO-1, and  $\beta$ -catenin ( $\beta$ -cat), were quantified by immunoblot of HAstV-1 or mock infected Caco-2 cell lysates. (C) Bands were then quantified by densitometry and normalized to  $\beta$ -actin then compared to mock-infection. Error bars indicate standard deviations three independent experiments performed in duplicate, p-value as measured by Ordinary One-way ANOVA followed by a test for trend is indicated for each protein.

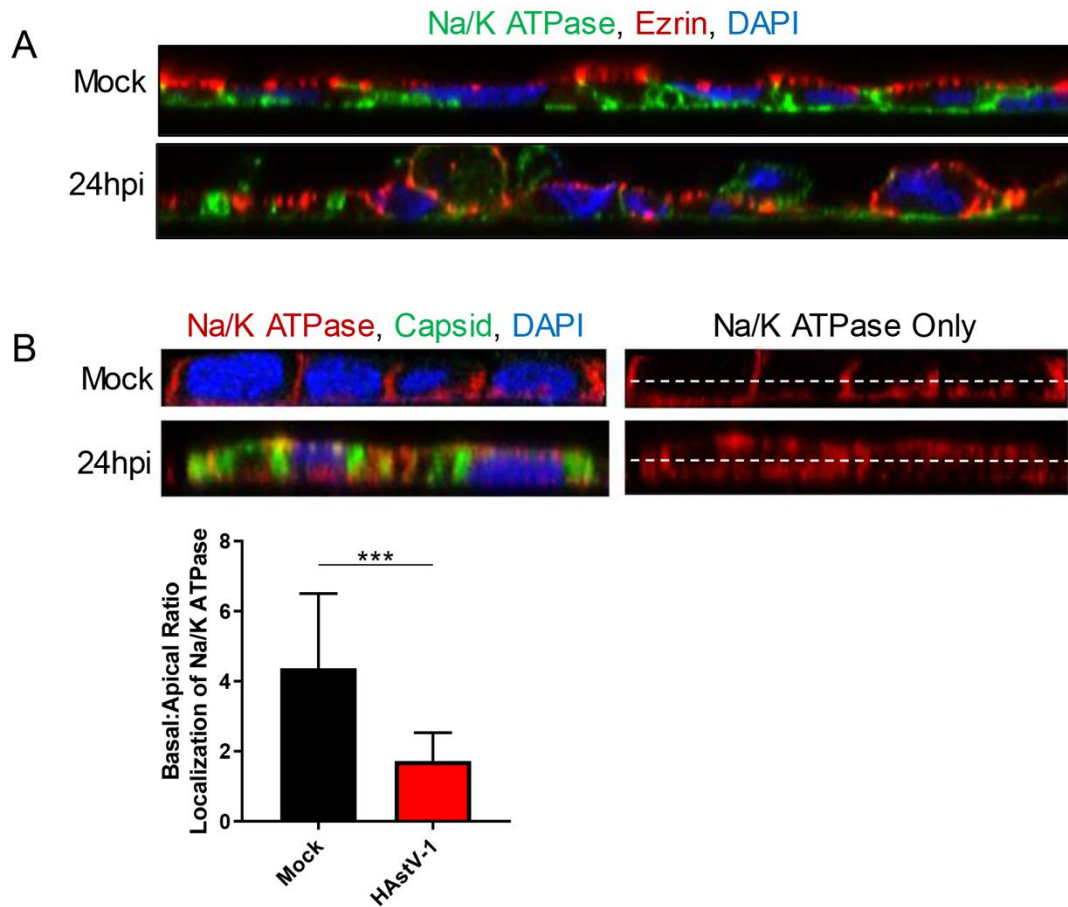

640  
641  
642  
643  
644  
645  
646  
647  
648  
649  
650  
651

**Fig. 3. HAstV-1 infection leads to a disruption of cellular polarity.** (A) Caco-2 infected with HAstV-1 or mock infected (as indicated). Cells were fixed at 24 hpi in 100% ice-cold methanol and then stained for ezrin (red), sodium-potassium ATPase (green), and DAPI (blue). Images are representative of at least three independent experiments. (B) Basal or apical localization of sodium-potassium ATPase was determined by measuring intensity above and below cell midline of HAstV- or mock-infected cells using ImageJ. Error bars indicate standard deviations of three independent experiments performed in triplicate, and asterisks show statistical significance as measured by the two-tailed Student *t* test as follows: \*,  $P < 0.05$ ; \*\*,  $P < 0.01$ ; \*\*\*,  $P < 0.001$ .



652

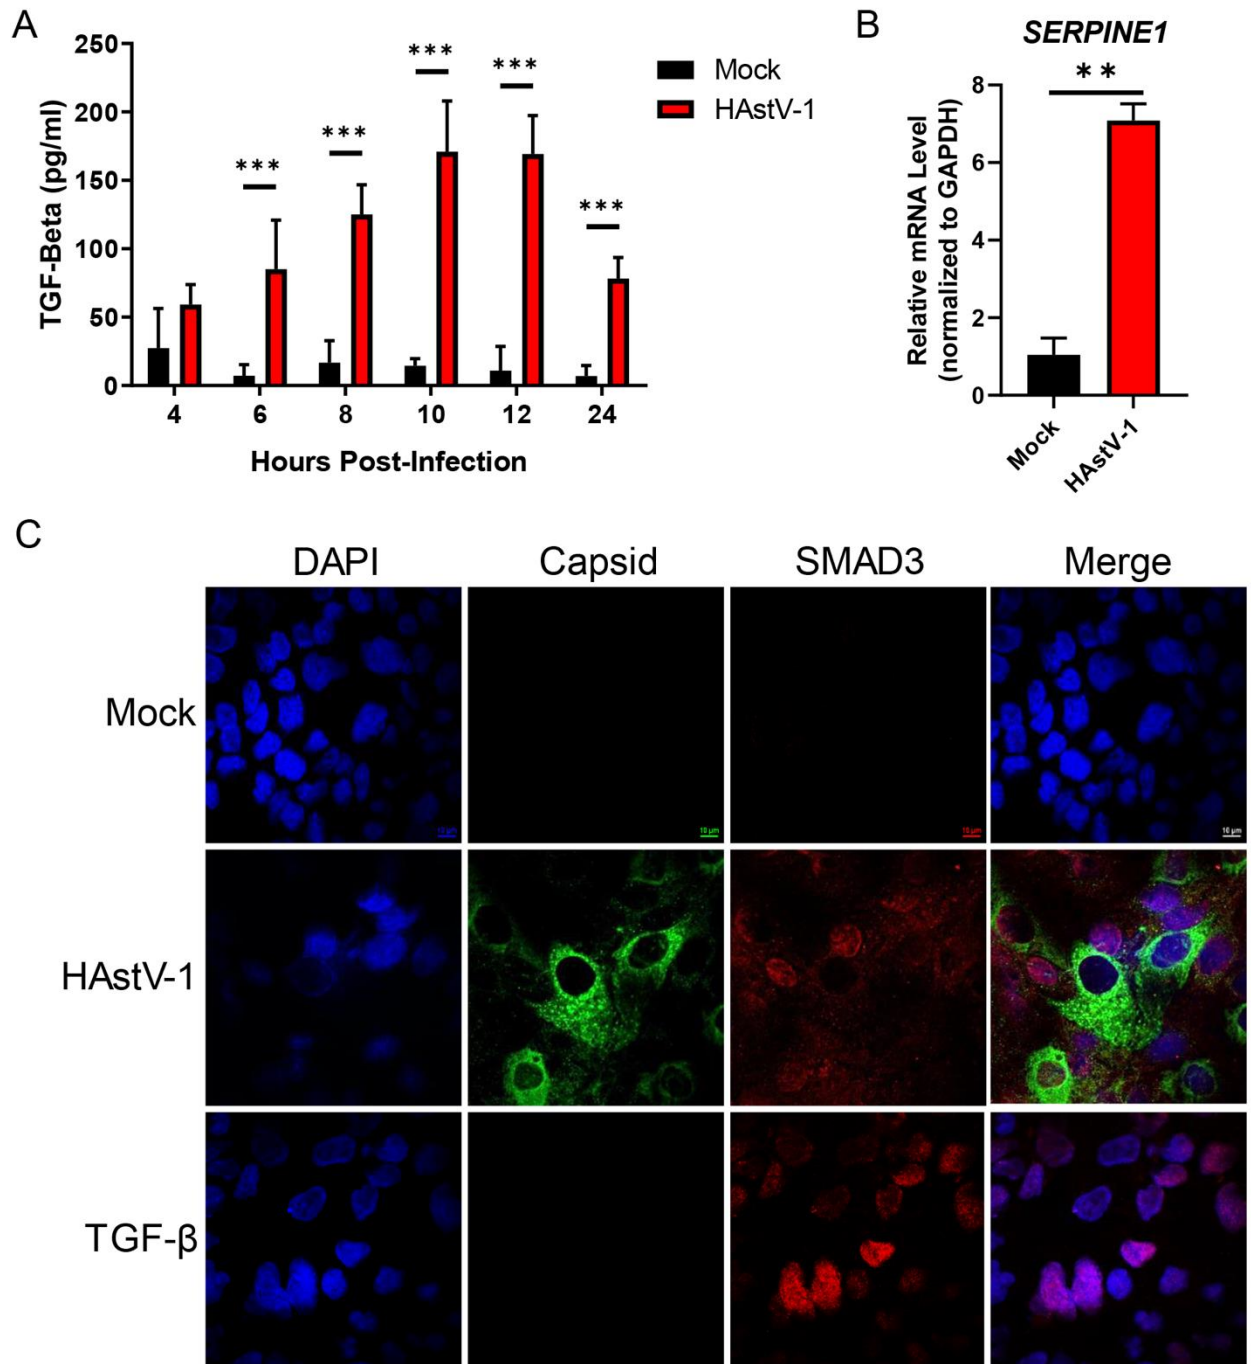

653  
654  
655  
656  
657  
658  
659  
660  
661  
662

**Fig. 4. TGF- $\beta$  activity increases during the course of HAstV-1 infection.** (A) Supernatants were collected from Caco-2 infected with HAstV-1 or mock infected

663  
664  
665  
666  
667  
668  
669  
670  
671  
672  
673  
674  
675  
676

from 4 to 24 hpi. Supernatants were then assayed for active TGF- $\beta$  using the PAI assay as described previously [32]. Error bars indicate standard deviations from two independent experiments performed in duplicate, and asterisks show statistical significance as measured by two-way ANOVA followed by Sidak's multiple comparisons test as follows: \*,  $P < 0.05$ ; \*\*,  $P < 0.01$ ; \*\*\*,  $P < 0.001$ . (B) *SERPINE1*, which is specifically activated by TGF- $\beta$ , mRNA levels were measured in mock infected or HAstV-1 infected Caco-2 cells at 24 hpi. Error bars indicate standard deviations from two independent experiments performed in duplicate, and asterisks show statistical significance as measured by the two-tailed Student *t* test as follows: \*,  $P < 0.05$ ; \*\*,  $P < 0.01$ ; \*\*\*,  $P < 0.001$ . (C) Caco-2 cells mock infected, HAstV-1 infected, or treated with 20ng/ml of TGF- $\beta$  stained for SMAD3 (red), astrovirus capsid protein (green) and DAPI (blue). Images are representative of two independent experiments.

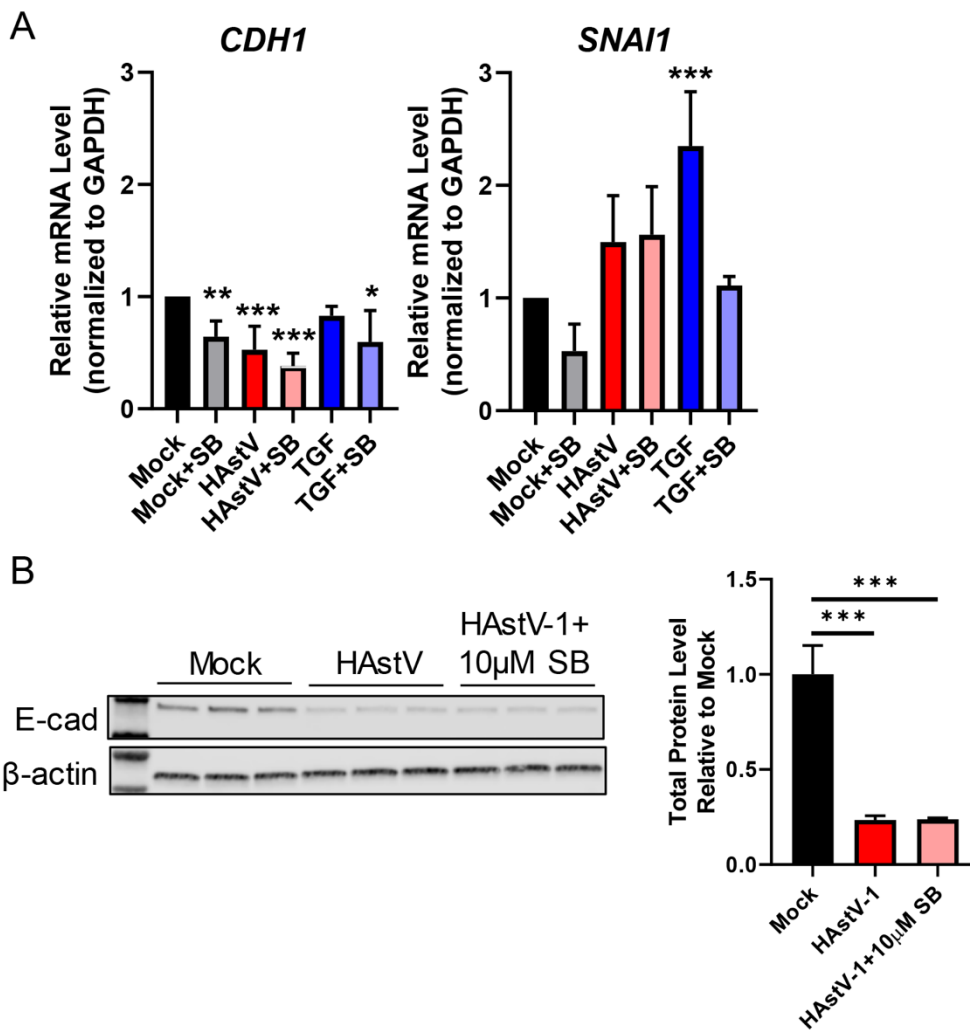

677  
678  
679  
680  
681  
682  
683

**Fig. 5. Inhibition of TGF- $\beta$  signaling with SB431542 does not inhibit HAstV-1 induced EMT.** (A) RNA extracted at 24 hpi from Caco-2 cells infected with HAstV-1, TGF- $\beta$  treated, or mock infected with or without 10 $\mu$ M SB431542 shows

684 SB431542 does not rescue *CDH1* or *SNAI1* regulation in HAstV-induced EMT.  
685 (B) Expression of epithelial marker, E-cadherin, was quantified by immunoblot of  
686 HAstV-1 or mock infected Caco-2 cell lysates with or without 10 $\mu$ M SB431542.  
687 Bands were then quantified by densitometry and normalized to  $\beta$ -actin then  
688 compared to mock-infection. All error bars indicate standard deviations of two  
689 independent experiments performed in triplicate, and asterisks show statistical  
690 significance as measured by ordinary one-way ANOVA followed by Dunnett's  
691 multiple comparisons test as follows: \*,  $P < 0.05$ ; \*\*,  $P < 0.01$ ; \*\*\*,  $P < 0.001$ .  
692  
693

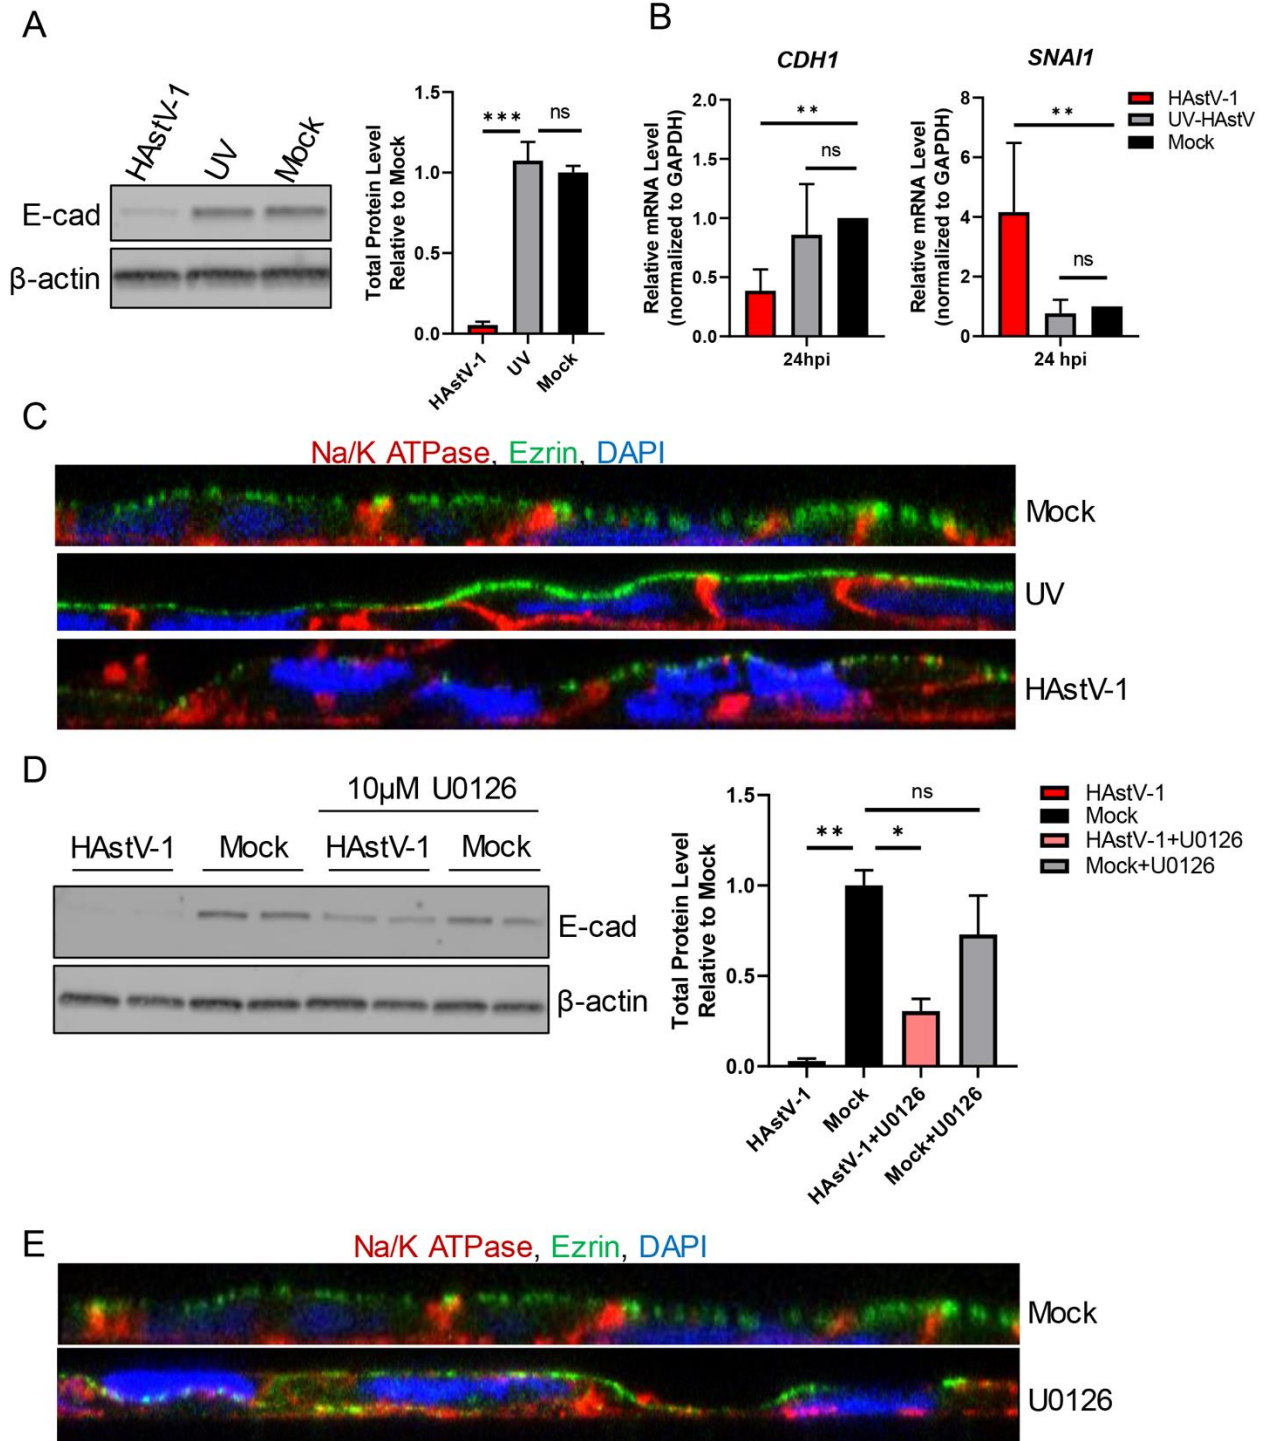

694  
695  
696  
697  
698  
699  
700  
701

702 **Fig. 6. Replication is required for HAstV-1 induced EMT.** (A) Expression of E-  
703 cadherin was quantified by immunoblot of HAstV-1, UV-inactivated HAstV-1, or  
704 mock infected Caco-2 cell lysates. Bands were then quantified by densitometry  
705 and normalized to  $\beta$ -actin then compared to mock-infection. (B) RNA extracted at  
706 24 hpi from Caco-2 cells infected with HAstV-1, UV-inactivated HAstV-1, or mock  
707 infected show UV-inactivated virus does not modulate *CDH1* or *SNAI1* regulation  
708 as active HAstV-1 does. (C) Na/K ATPase (red) and ezrin (green) localization in  
709 Caco-2 cells inoculated with UV-inactivated HAstV-1 shows no difference to  
710 mock infected cells. (D) Expression of E-cadherin was quantified by immunoblot  
711 of HAstV-1, HAstV-1 + 10 $\mu$ M U0126, or mock infected Caco-2 cell lysates. Bands  
712 were then quantified by densitometry and normalized to  $\beta$ -actin then compared to  
713 mock-infection. (E) Na/K ATPase (red) and ezrin (green) localization in Caco-2  
714 cells infected with HAstV-1 in the presence of 10 $\mu$ M U0126 and mock infected  
715 cells. All error bars indicate standard deviations of three independent  
716 experiments performed in triplicate, and asterisks show statistical significance as  
717 measured by ordinary one-way ANOVA followed by Dunnett's multiple  
718 comparisons test as follows: \*,  $P < 0.05$ ; \*\*,  $P < 0.01$ ; \*\*\*,  $P < 0.001$ .  
719

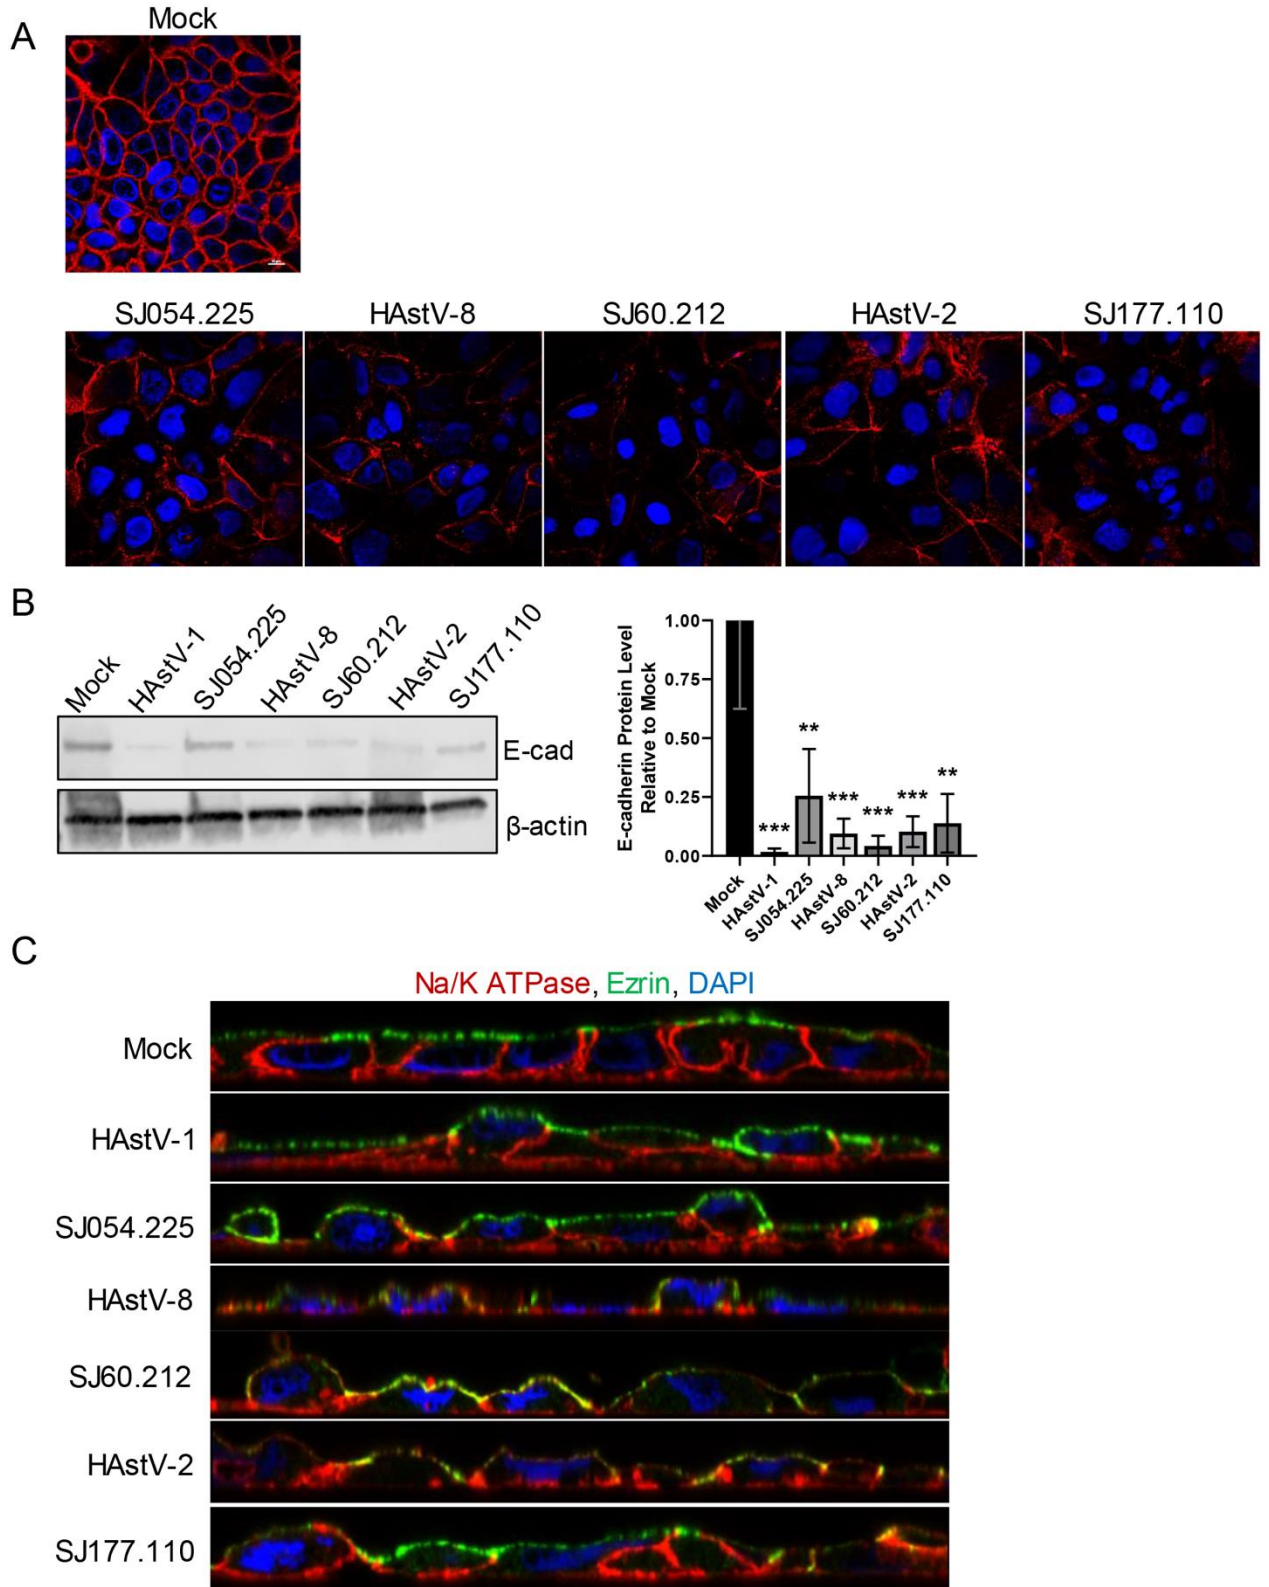

720  
721  
722  
723

724 **Fig. 7. Multiple HAstV serotypes and clinical isolates induce EMT.** (A) Caco-2  
725 monolayers on grown coverslips, infected with HAstV-1 (lab-adapted), SJ054.225  
726 (HAstV-1 isolate), HAstV-8 (lab-adapted), SJ60.212 (HAstV-8 isolate), HAstV-2  
727 (lab-adapted), SJ177.110 (HAstV-2 isolate) or mock infected. Cells were fixed at  
728 24hpi and stained for E-cadherin (red) and DAPI (blue). (B) Expression of E-  
729 cadherin was quantified by immunoblot of HAstV-1 (lab adapted), SJ054.225  
730 (HAstV-1 isolate), HAstV-8 (lab adapted), SJ60.212 (HAstV-8 isolate), HAstV-2  
731 (lab adapted), SJ177.110 (HAstV-2 isolate) infected (MOI of 10) or mock infected  
732 Caco-2 cell lysates. Bands were then quantified by densitometry and normalized  
733 to  $\beta$ -actin then compared to mock-infection. Error bars indicate standard  
734 deviations of two independent experiments performed in triplicate, and asterisks  
735 show statistical significance as measured by ordinary one-way ANOVA followed  
736 by Dunnett's multiple comparisons test as follows: \*,  $P < 0.05$ ; \*\*,  $P < 0.01$ ; \*\*\*,  $P$   
737  $< 0.001$ . (C) Na/K ATPase (red) and ezrin (green) localization in Caco-2 cells  
738 infected with lab adapted and clinical isolate HAstVs is disrupted compared to  
739 mock infected cells. All images are representative of two independent  
740 experiments.  
741

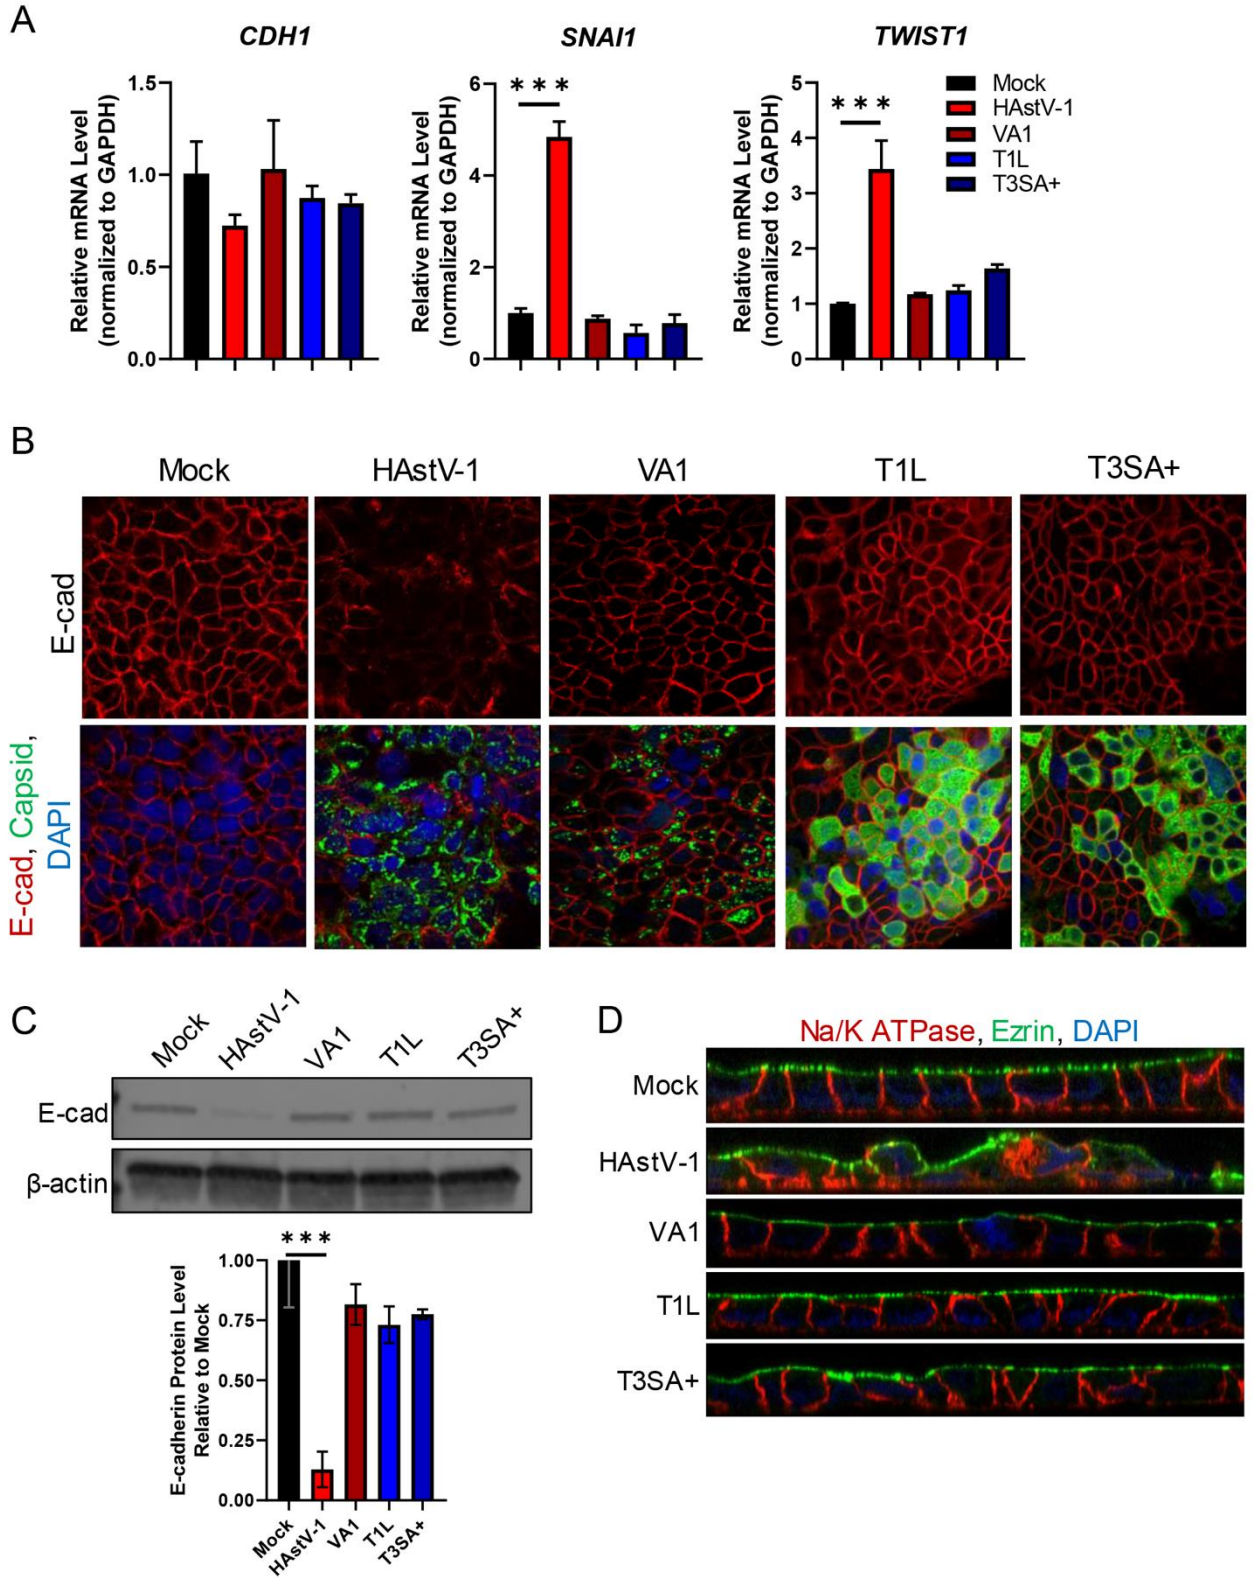

742  
743  
744  
745



746  
747  
748  
749  
750  
751  
752  
753  
754  
755  
756  
757  
758  
759  
760  
761  
762  
763  
764

**Fig. 8. Other enteric viruses do not induce EMT in Caco-2 cells.** (A) Caco-2 monolayers grown on permeable supports were infected with HAstV-1, HAstV-VA1, T1L, T3SA+ (MOI of 10) or mock-infected and TER (transepithelial electrical resistance) was measured from 0-24 hpi. (B) RNA extracted at 24 hpi from Caco-2 cells infected with HAstV-1, HAstV-VA1, T1L, T3SA+, or mock infected, show only HAstV-1 modulate *CDH1*, *SNAI1*, and *TWIST1*. (C) Infected cells were fixed at 24hpi and stained for E-cadherin (red), viral capsid (green), and DAPI (blue). (D) Expression of E-cadherin was quantified by immunoblot of HAstV-1, HAstV-VA1, T1L, T3SA+ infected (MOI of 10) or mock infected Caco-2 cell lysates. Bands were then quantified by densitometry and normalized to  $\beta$ -actin then compared to mock-infection. (E) Na/K ATPase (red) and ezrin (green) localization is disrupted in cells infected with HAstV-1 compared to HAstV-VA1, T1L, T3SA+, and mock infected cells. All error bars indicate standard deviations of two independent experiments performed in triplicate, and asterisks show statistical significance as measured by ordinary one-way ANOVA followed by Dunnett's multiple comparisons test as follows: \*,  $P < 0.05$ ; \*\*,  $P < 0.01$ ; \*\*\*,  $P < 0.001$ . All images are representative of two independent experiments.

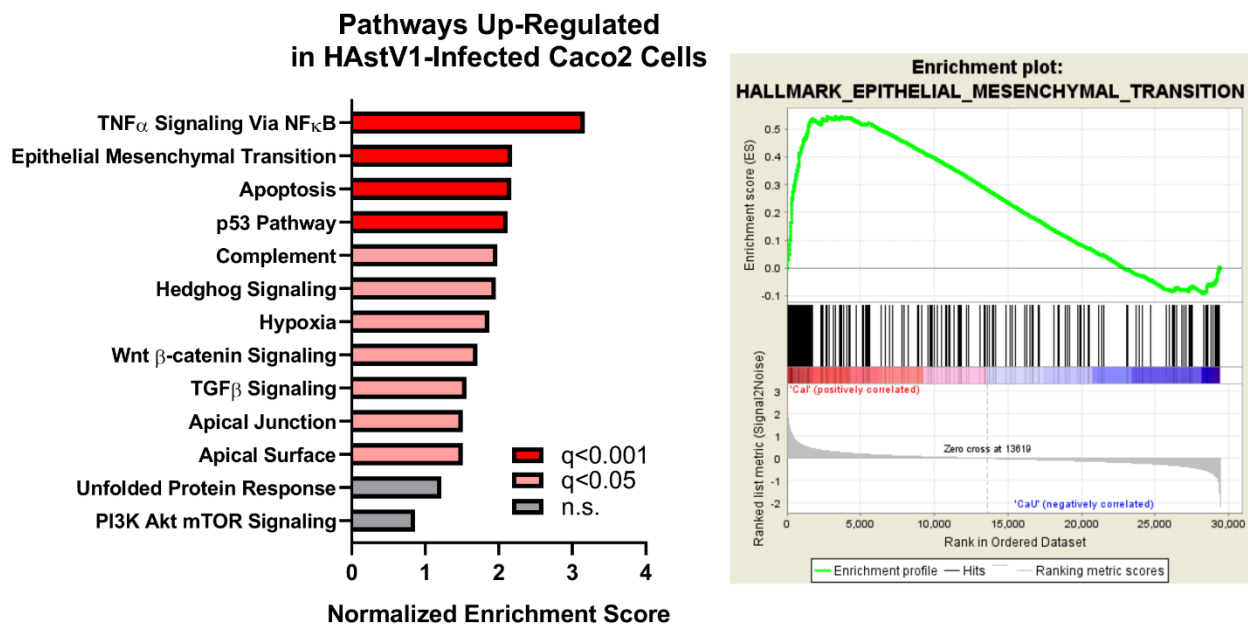

765

766  
767  
768  
769  
770  
771  
772  
773  
774

**Fig. S1. EMT pathway is upregulated in HAstV-infected Caco-2 cells.** Gene set enrichment analysis was performed on HAstV-infected (MOI of 10) and uninfected Caco-2 intestinal epithelial cells. Shown are top upregulated hallmark pathways' normalized enrichment scores with false discovery rate estimated by Benjamin-Hochberg method cut-offs of  $q < 0.001$  (red),  $q < 0.05$  (blue), and  $q > 0.05$  or non-significant (gray).

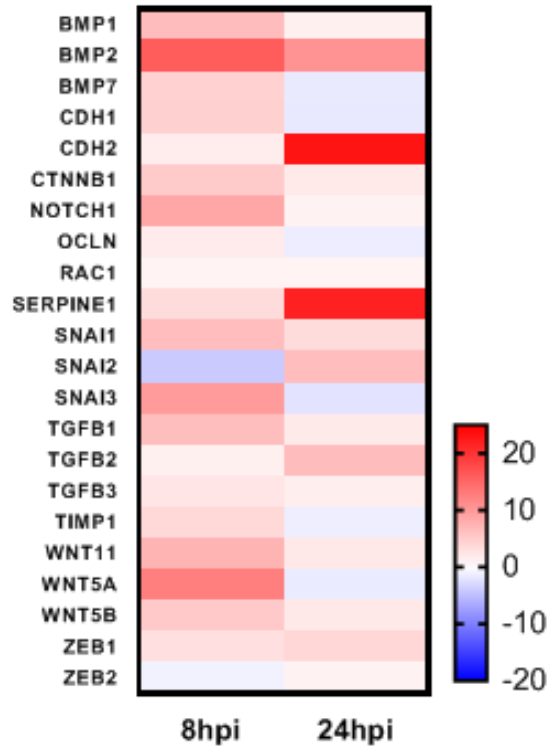

775

776

777

778

779

780

781

782

783

**Fig. S2. EMT-associated genes modulated by HAstV infection.** Heatmap showing fold regulation of EMT associated genes from Qiagen's RT2 Profiler PCR Array Human Epithelial to Mesenchymal Transition (EMT). RNA samples were collected from HAstV-infected or mock-infected cells at 8 and 24 hpi. Gene expression values are colored corresponding to the up (red) or downregulation (blue) relative to mock-infected cells.

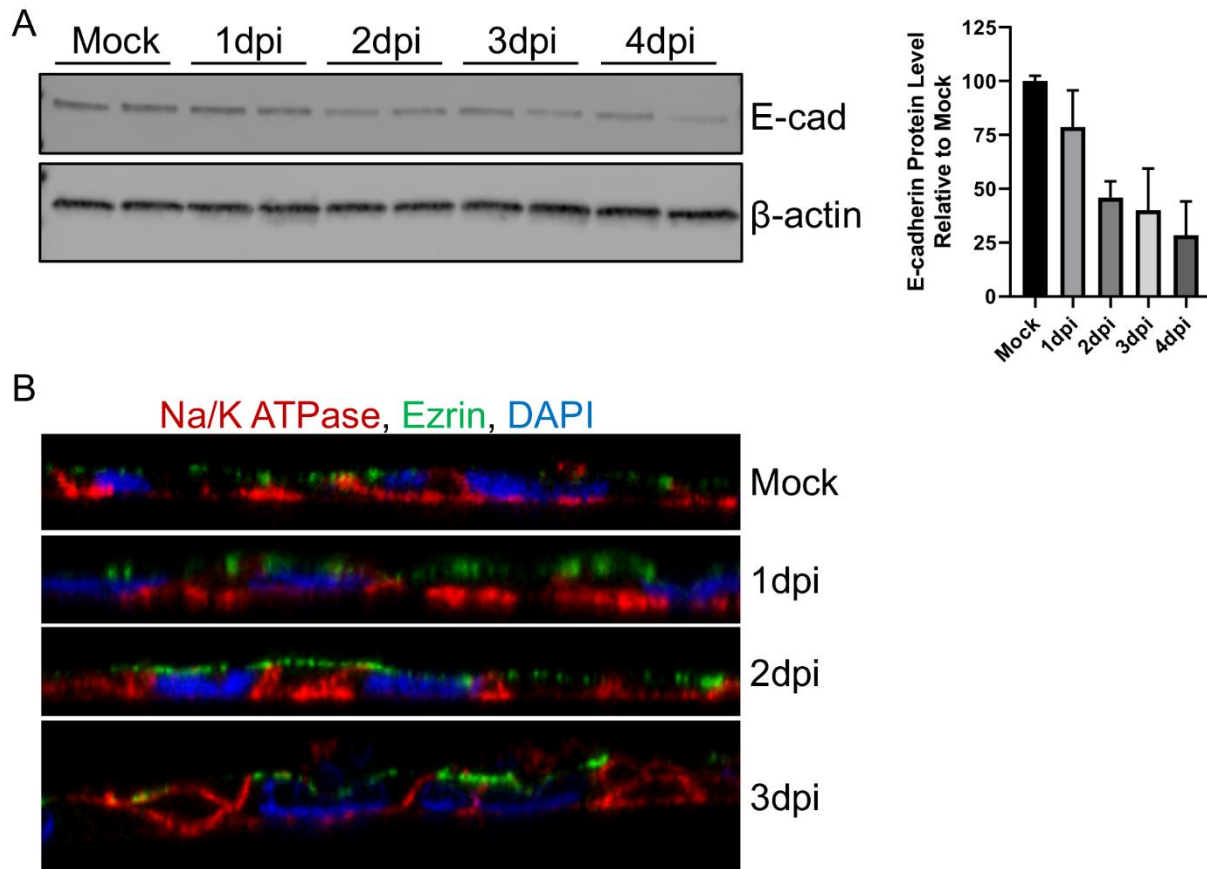

784

785

786

787

788

789

790

791

792

793

**Fig. S3. TGF- $\beta$  induced EMT in Caco-2 cells.** (A) Western blot of E-cadherin at 1, 2, 3, and 4 days post inoculation with 20 ng/ml active TGF- $\beta$  compared to mock. Bands were quantified by densitometry and normalized to  $\beta$ -actin then compared to mock-infection. (B) Caco-2 inoculated with 20ng/ml active TGF- $\beta$  or mock treated (as indicated). Cells were fixed at 1, 2, or 3 days post-inoculation in 100% ice-cold methanol and then stained for ezrin (green), Na/K ATPase (red), and DAPI (blue).

## Pathways Down-Regulated in Permissive Caco2 Cells

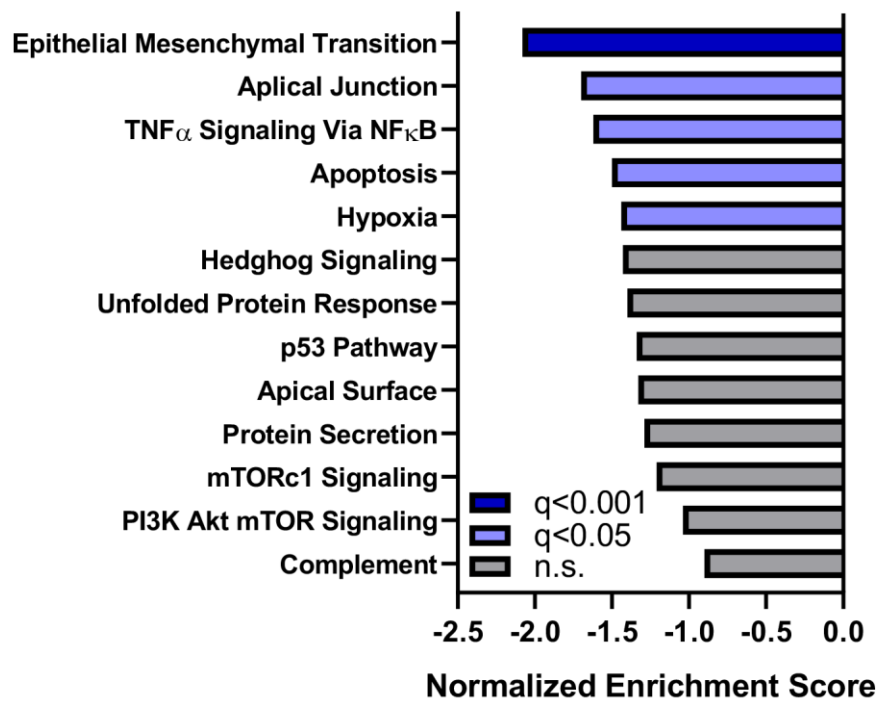

794

795

796

797

798

799

800

801

802

**Fig. S4. EMT pathway is downregulated in permissive Caco-2 cells at baseline.**

Gene set enrichment analysis was performed on differentiated and sub-confluent uninfected Caco-2 intestinal epithelial cells. Shown are top downregulated hallmark pathways' normalized enrichment scores with false discovery rate estimated by Benjamin-Hochberg method cut-offs of  $q < 0.001$  (red),  $q < 0.05$  (blue), and  $q > 0.05$  or non-significant (gray).
